# Supplementary material for: Potential for release of pulmonary toxic ketene from vaping pyrolysis of vitamin E acetate
Source: PubMed Central journal article supplement — Proc Natl Acad Sci U S A. 2020 Mar 10;117(12):6349–55. doi: 10.1073/pnas.1920925117 (PMC7104367; doi:10.1073/pnas.1920925117), 2020-03-10

Supporting Information  
**Potential for Release of Pulmonary Toxic Ketene from Vaping Pyrolysis of  
Vitamin E Acetate**

Dan Wu\* and Donal F. O'Shea\*

**Table of Contents**

General methods and computational details

- Figure **S1**. APCI-MS cone voltage study for phenyl acetate **3**.
- Figure **S2**. APCI-MS cone voltage study for vitamin E acetate **1**.
- Figure **S3**. APCI-MS cone voltage studies for vitamin E **2**.
- Figure **S4**. DFT calculation data for **3** and its pyrolysis transition state.
- Figure **S5**. DFT calculation data for **1** and its pyrolysis transition state.
- Figure **S6**. DFT calculation data for **6** and its pyrolysis transition state.
- Figure **S7**. DFT calculation data for chroman retro Diels-Alder transition state for **1**.
- Figure **S8**. APCI-MS cone voltage studies of isolated vaped **1**.
- Figure **S9**. <sup>1</sup>H NMR spectrum of isolated vaped **1**.
- Figure **S10**. <sup>1</sup>H NMR spectrum of non-volatile component (NVC) isolated from vaped **1**.
- Figure **S11**. Identification of duroquinone **8** and prist-1-ene **7** in NVC of isolated vaped mixture from **1** by <sup>1</sup>H NMR, <sup>13</sup>C NMR, <sup>1</sup>H COSY, HSQC and HMBC.
- Figure **S12**. HPLC identification of duroquinone **8** in non-volatile component (NVC) of isolated mixture from vaped **1**.
- Figure **S13**. GC-MS identification of duroquinone **8** in non-volatile component (NVC) of isolated mixture from vaped **1**.
- Figure **S14**. Identification of benzene, ethene, propene, butadiene, THF, 2-methylprop-1-ene in volatile component (VC) of isolated vaped mixture from **1** by <sup>1</sup>H NMR, <sup>13</sup>C NMR, <sup>1</sup>H COSY, HSQC and HMBC.
- Figure **S15**. <sup>1</sup>H NMR, HPLC and MS spectra of isolated vaped **1** with benzylamine **9** as trap for ketene.
- Figure **S16**. <sup>1</sup>H NMR spectrum of synthesized benzylamide **10**.
- Figure **S17**. HPLC of isolated vaped **1** mixture with benzylamine **9** as trap for ketene.
- Figure **S18**. GC-MS of isolated vaped **1** mixture with benzylamine **9** as trap for ketene.
- Figure **S19**. Photographs of experimental setup for Fig. 11A-C.
- Appendix of <sup>1</sup>H NMR of pure **1**, **2**, **8** and **9**.

## General Methods.

Atmospheric-pressure chemical ionization (APCI) and electrospray ionization (ESI) mass spectra were acquired using Advion Expression Mass Spectrometer in positive and negative modes as required.  $^1\text{H}$  NMR and  $^{13}\text{C}$  NMR spectra were recorded at room temperature at 400 MHz and 100 MHz respectively, and calibrated using residual non-deuterated solvent as an internal reference. HPLC analysis used an Atlantis dC18 reverse phase column (5 $\mu\text{M}$ , 4.6 x 250 mm with UV-Vis detector at 254 and 220 nm). GC-MS analysis used a Waters GCT Premier Micromass system with an Optima 5 MS (length 15 m, inner diameter 0.25 mm, outer diameter 0.40 mm) GC column and ESI positive mode MS detector.

GC conditions: initial temperature: 50 °C; maximum temp 360 °C, equilibrium time: 0.20 min, inject. Inlet: initial temp: 260 °C, split ratio: 10.0; purge flow: 40.0 mL/min. Temp. ramp:

| Rate (°C/min) | Final temp (° C) | Hold time (min) | Total time (min) |
|---------------|------------------|-----------------|------------------|
| 35.00         | 120              | 0.0             | 3.1              |
| 10.00         | 250              | 0.0             | 16.1             |
| 35.00         | 300              | 4.0             | 21.5             |

All vaping experiments were carried out in a ventilated fumehood.

## Computational Details.

All of the calculations reported in this work were carried out using the Gaussian 09e01 package from Irish Centre for High-End Computing (ICHEC). The M06-2X density-functional method in conjunction with the 6-311G(d,p) basis set was selected for all the geometry optimizations and frequency analysis. All geometries were optimized in gas phase. Frequency calculations at 298.15 K and 1 atm pressure on all the stationary points were carried out at the same level of theory as the geometry optimizations to ascertain the nature of the stationary points. All of the presented relative energies are free energies at 298.15 K with respect to the reactants, unless otherwise stated. Each TS was confirmed by IRC calculations and vibrational analysis showing a single imaginary frequency. A six-membered TS in which proton transfer to an *ortho*-aryl ring position followed by enolization to phenol has also been proposed for the loss of ketene from phenyl acetate (**1**). As the *ortho* aryl positions of **1** are methyl substituted loss of ketene is unlikely to proceed through six-membered proton transfer to the aryl ring so the four membered TS was selected for comparative calculations.

1. E. Marquez, *et al.*, Electrocyclic [1,5] hydrogen shift in the thermal elimination kinetics of phenyl acetate and *p*-tolyl-acetate in the gas phase: a density functional theory study. *Mol. Phys.*, **112**, 462-473 (2014).

**Figure S1.** APCI-MS cone-voltage study for phenyl acetate **3**.

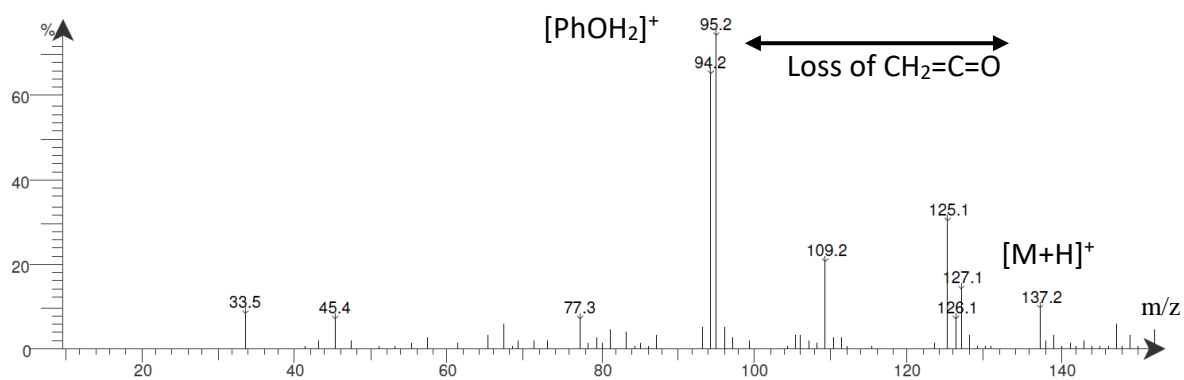

**Fig. S1a:** 10 eV, APCI-MS (positive mode).

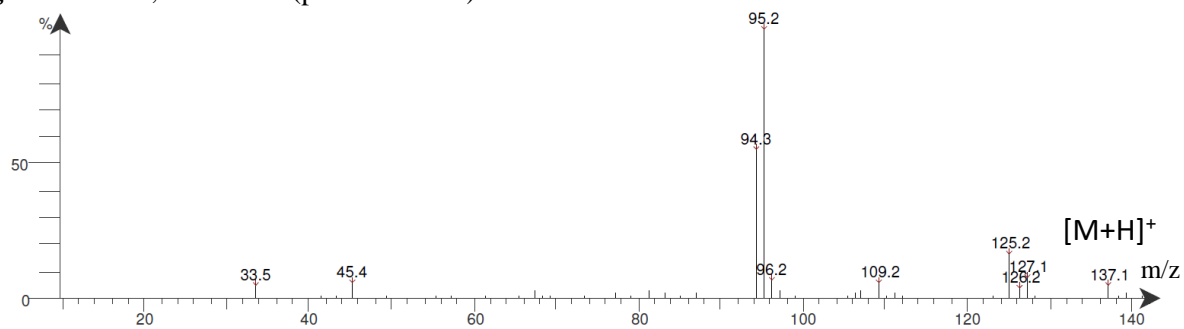

**Fig. S1c:** 20 eV, APCI-MS (positive mode).

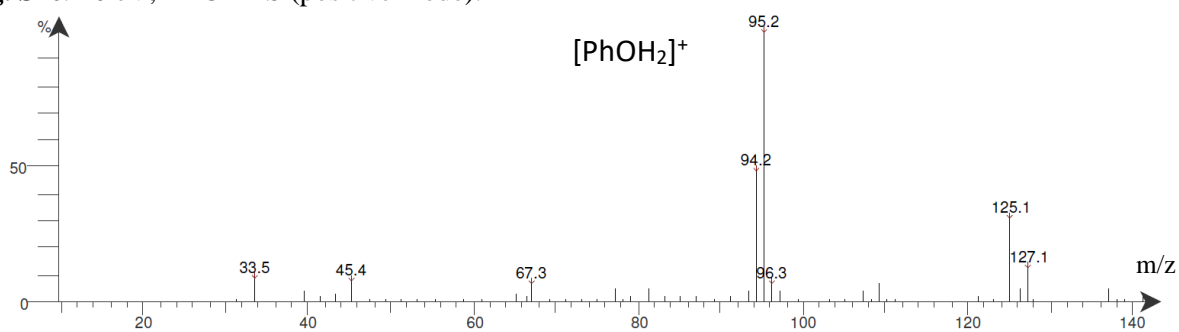

**Fig. S1d:** 25 eV, APCI-MS (positive mode).

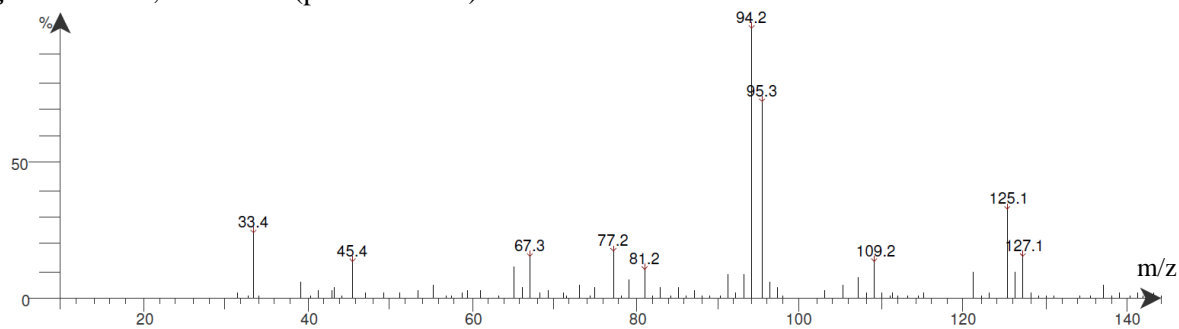

**Fig. S1e:** 30 eV, APCI-MS (positive mode).

**Figure S2.** APCI-MS cone-voltage studies for vitamin E acetate **1**

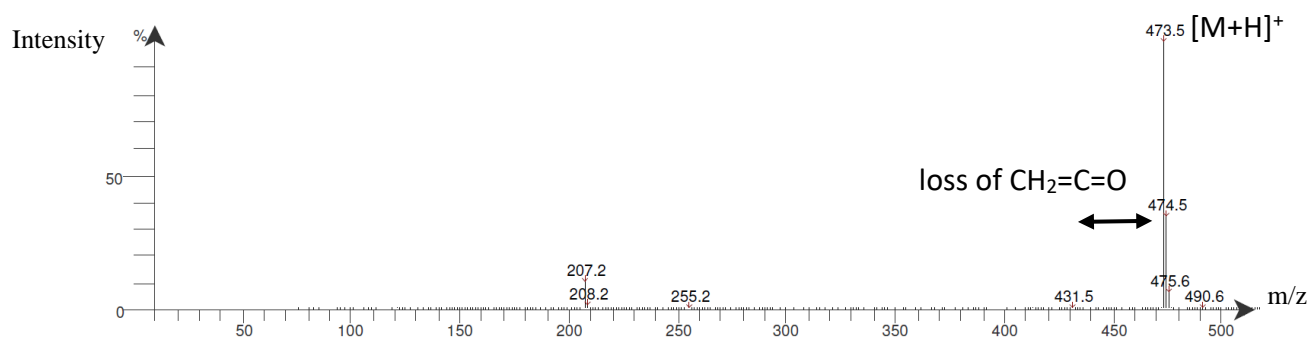

**Fig. S2a:** 5 eV, APCI-MS (positive mode).

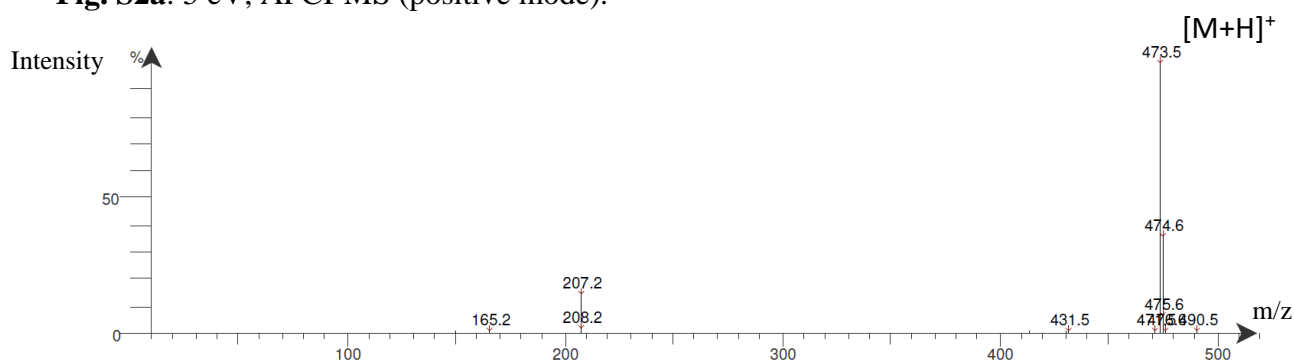

**Fig. S2b:** 10 eV, APCI-MS (positive mode).

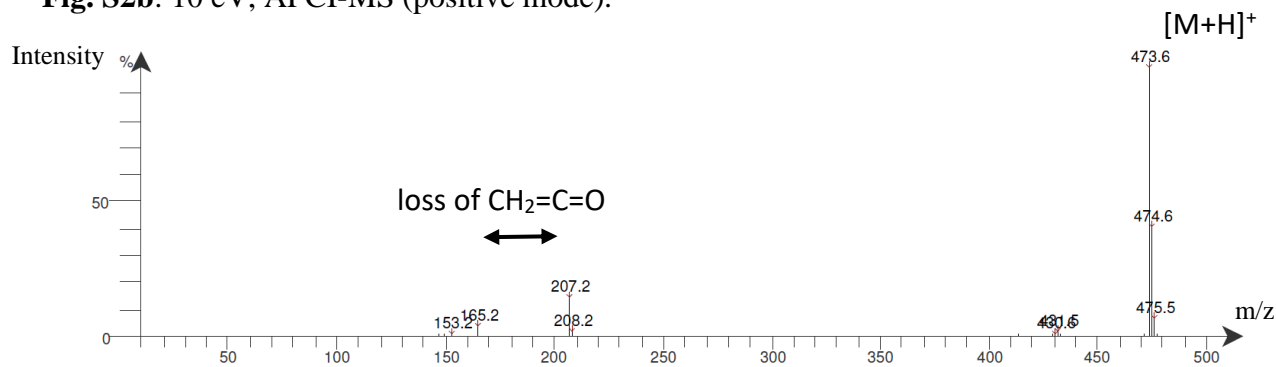

**Fig. S2c:** 15 eV, APCI-MS (positive mode).

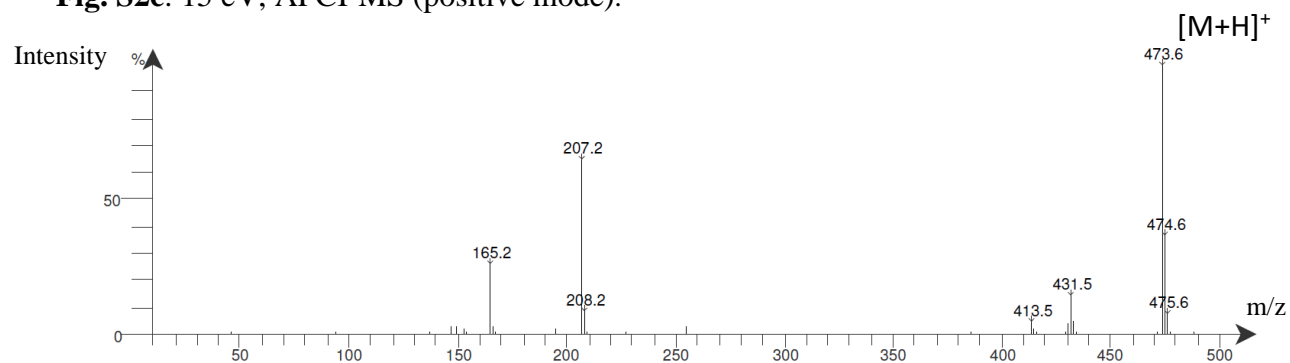

**Fig. S2d:** 20 eV, APCI-MS (positive mode).

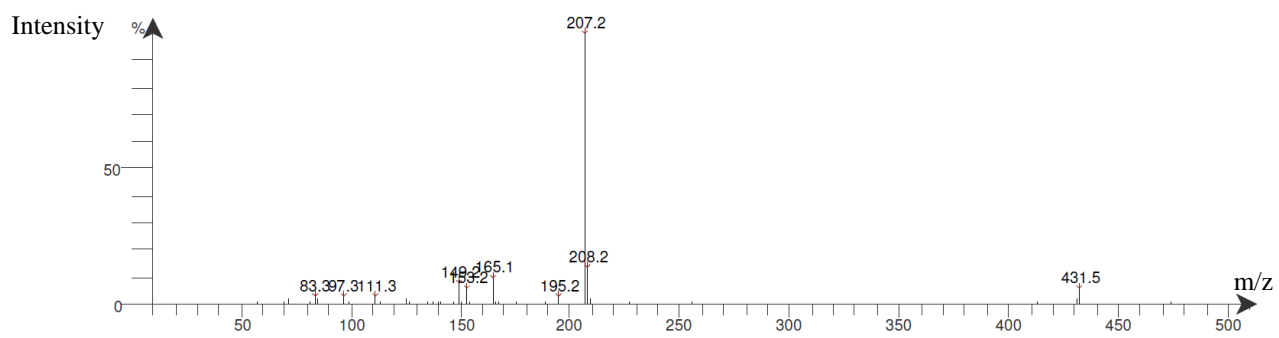

**Fig. S2f:** 30 eV, APCI-MS (positive mode).

**Figure S3.** APCI-MS cone-voltage studies for vitamin E 2

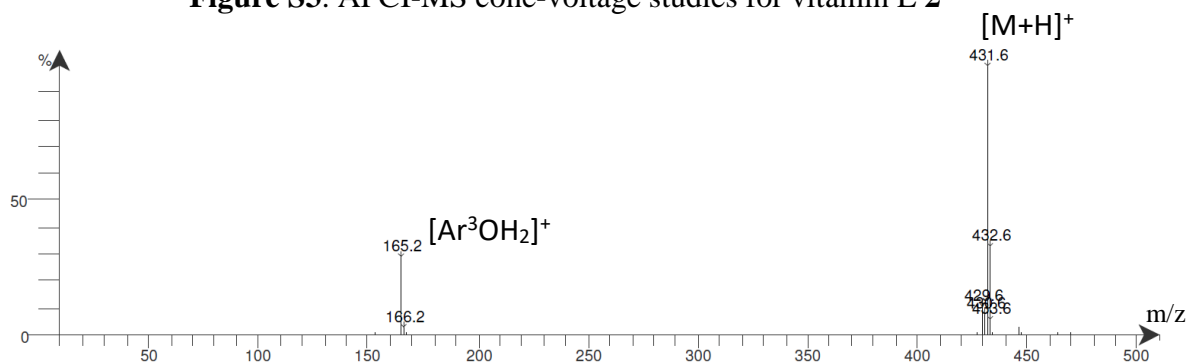

**Fig. S3a:** 5 eV, APCI-MS (positive mode).

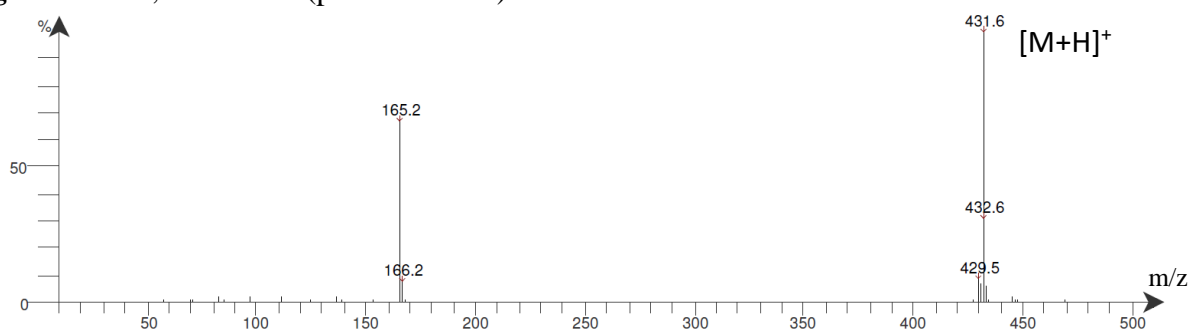

**Fig. S3b:** 10 eV, APCI-MS (positive mode).

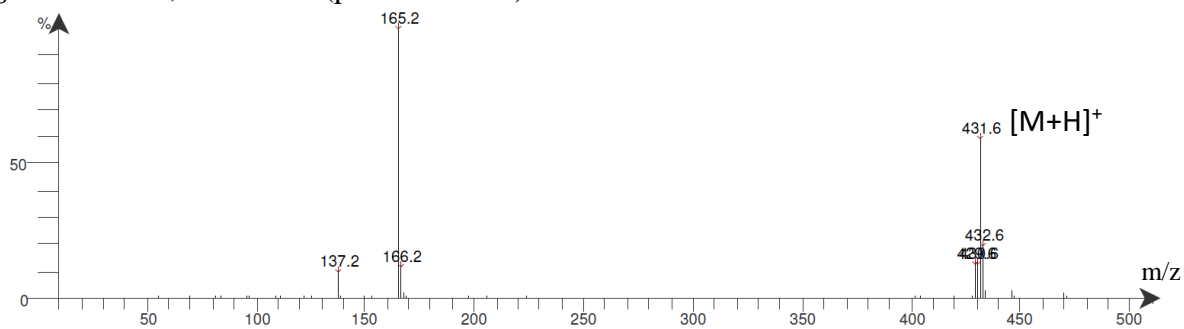

**Fig. S3c:** 20 eV, APCI-MS (positive mode).

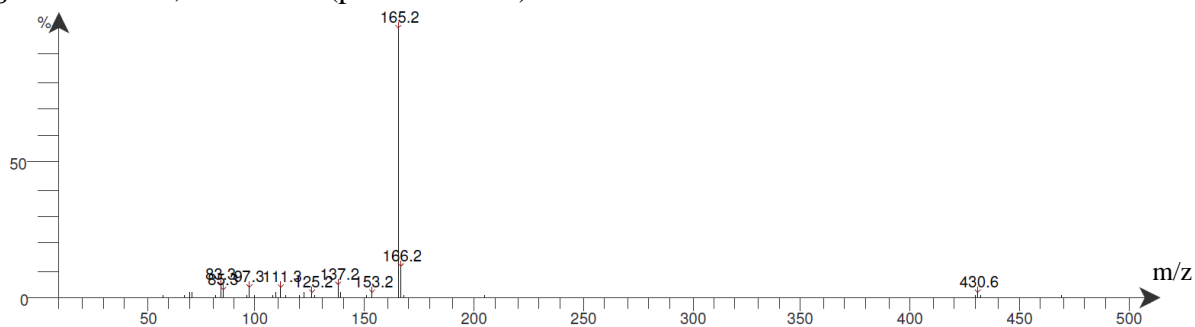

**Fig. S3d:** 30 eV, APCI-MS (positive mode).

**Figure S4.** DFT calculation data for **3** and transition state

Ground state structure of phenyl acetate **3**

E(RM062X) = -460.052680107  
Zero-point correction= 0.143297 (Hartree/Particle)  
Thermal correction to Energy = 0.152147  
Thermal correction to Enthalpy = 0.153091  
Thermal correction to Gibbs Free Energy = 0.108399  
Sum of electronic and zero-point Energies = -459.909383  
Sum of electronic and thermal Energies = -459.900533  
Sum of electronic and thermal Enthalpies = -459.899589  
Sum of electronic and thermal Free Energies = -459.944281

Standard orientation:

| Center Number | Atomic Number | Atomic Type | Coordinates (Angstroms) |           |           |
|---------------|---------------|-------------|-------------------------|-----------|-----------|
|               |               |             | X                       | Y         | Z         |
| 1             | 6             | 0           | -2.461087               | -1.071596 | 0.274742  |
| 2             | 6             | 0           | -2.960549               | 0.213076  | 0.092541  |
| 3             | 6             | 0           | -2.093537               | 1.249227  | -0.236957 |
| 4             | 6             | 0           | -0.731044               | 1.017001  | -0.385217 |
| 5             | 6             | 0           | -0.249634               | -0.271794 | -0.194087 |
| 6             | 6             | 0           | -1.101048               | -1.317314 | 0.133526  |
| 7             | 1             | 0           | -3.128229               | -1.886254 | 0.528666  |
| 8             | 1             | 0           | -4.020091               | 0.406237  | 0.205620  |
| 9             | 1             | 0           | -2.477563               | 2.252054  | -0.379570 |
| 10            | 1             | 0           | -0.053316               | 1.821804  | -0.630791 |
| 11            | 1             | 0           | -0.684038               | -2.307996 | 0.265038  |
| 12            | 8             | 0           | 1.084015                | -0.610537 | -0.389011 |
| 13            | 6             | 0           | 2.077816                | 0.157872  | 0.139254  |
| 14            | 6             | 0           | 3.412590                | -0.446371 | -0.192692 |
| 15            | 1             | 0           | 3.500814                | -0.567763 | -1.272771 |
| 16            | 1             | 0           | 4.200639                | 0.198517  | 0.185922  |
| 17            | 1             | 0           | 3.484469                | -1.436762 | 0.258890  |
| 18            | 8             | 0           | 1.893018                | 1.152982  | 0.770553  |

Ground state structure of ketene **4**

E(RM062X) = -152.578714584  
Zero-point correction = 0.032023 (Hartree/Particle)  
Thermal correction to Energy = 0.035501  
Thermal correction to Enthalpy = 0.036445  
Thermal correction to Gibbs Free Energy = 0.009110  
Sum of electronic and zero-point Energies = -152.546692  
Sum of electronic and thermal Energies = -152.543214  
Sum of electronic and thermal Enthalpies = -152.542270  
Sum of electronic and thermal Free Energies = -152.569605

Standard orientation:

| Center Number | Atomic Number | Atomic Type | Coordinates (Angstroms) |           |           |
|---------------|---------------|-------------|-------------------------|-----------|-----------|
|               |               |             | X                       | Y         | Z         |
| 1             | 6             | 0           | -0.000000               | -0.000000 | 0.103973  |
| 2             | 8             | 0           | -0.000000               | -0.000000 | 1.258820  |
| 3             | 6             | 0           | 0.000000                | 0.000000  | -1.204928 |
| 4             | 1             | 0           | -0.000000               | 0.940447  | -1.732415 |
| 5             | 1             | 0           | -0.000000               | -0.940447 | -1.732415 |

## Ground state structure of phenol **5**

E(RM062X) = -307.41735370  
Zero-point correction = 0.105600 (Hartree/Particle)  
Thermal correction to Energy = 0.111050  
Thermal correction to Enthalpy = 0.111994  
Thermal correction to Gibbs Free Energy = 0.076670  
Sum of electronic and zero-point Energies = -307.311755  
Sum of electronic and thermal Energies = -307.306305  
Sum of electronic and thermal Enthalpies = -307.305361  
Sum of electronic and thermal Free Energies = -307.340685  
Standard orientation:

| Center Number | Atomic Number | Atomic Type | Coordinates (Angstroms) |           |           |
|---------------|---------------|-------------|-------------------------|-----------|-----------|
|               |               |             | X                       | Y         | Z         |
| 1             | 6             | 0           | -1.127194               | 1.214015  | -0.000000 |
| 2             | 6             | 0           | 0.263486                | 1.194447  | 0.000000  |
| 3             | 6             | 0           | 0.937438                | -0.023909 | 0.000000  |
| 4             | 6             | 0           | 0.220142                | -1.218571 | 0.000000  |
| 5             | 6             | 0           | -1.166337               | -1.185985 | -0.000000 |
| 6             | 6             | 0           | -1.849530               | 0.027643  | -0.000000 |
| 7             | 1             | 0           | -1.644688               | 2.165939  | -0.000000 |
| 8             | 1             | 0           | 0.825228                | 2.123497  | 0.000000  |
| 9             | 1             | 0           | 0.769113                | -2.151795 | 0.000000  |
| 10            | 1             | 0           | -1.718883               | -2.118096 | -0.000000 |
| 11            | 1             | 0           | -2.931768               | 0.046321  | -0.000000 |
| 12            | 8             | 0           | 2.295374                | -0.110676 | 0.000000  |
| 13            | 1             | 0           | 2.669969                | 0.773706  | 0.000001  |

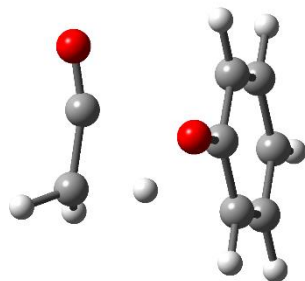

Transition state image of **3** → **4** + **5**

## Transition state structure for **3** → **4** + **5**

Imaginary Frequency: -1637.0775.  
E(RM062X) = -459.939805174  
Zero-point correction = 0.135319 (Hartree/Particle)  
Thermal correction to Energy = 0.144461  
Thermal correction to Enthalpy = 0.145405  
Thermal correction to Gibbs Free Energy = 0.099782  
Sum of electronic and zero-point Energies = -459.804486  
Sum of electronic and thermal Energies = -459.795344  
Sum of electronic and thermal Enthalpies = -459.794400  
Sum of electronic and thermal Free Energies = -459.840023

Standard orientation:



| Center<br>Number | Atomic<br>Number | Atomic<br>Type | Coordinates (Angstroms) |           |           |
|------------------|------------------|----------------|-------------------------|-----------|-----------|
|                  |                  |                | X                       | Y         | Z         |
| 1                | 6                | 0              | 2.337300                | -1.084505 | -0.206101 |
| 2                | 6                | 0              | 1.049393                | -1.220256 | 0.300383  |
| 3                | 6                | 0              | 0.267495                | -0.085306 | 0.550677  |
| 4                | 6                | 0              | 0.804453                | 1.182431  | 0.287040  |
| 5                | 6                | 0              | 2.090228                | 1.303622  | -0.219286 |
| 6                | 6                | 0              | 2.864656                | 0.173587  | -0.472868 |
| 7                | 1                | 0              | 2.932915                | -1.971434 | -0.390245 |
| 8                | 1                | 0              | 0.642878                | -2.198695 | 0.532814  |
| 9                | 1                | 0              | 0.197416                | 2.054695  | 0.501023  |
| 10               | 1                | 0              | 2.494613                | 2.290495  | -0.414095 |
| 11               | 1                | 0              | 3.868617                | 0.275123  | -0.865369 |
| 12               | 8                | 0              | -0.988722               | -0.201784 | 1.009236  |
| 13               | 1                | 0              | -1.719082               | -1.211474 | 0.552670  |
| 14               | 6                | 0              | -2.467855               | 0.177694  | -0.321309 |
| 15               | 8                | 0              | -2.834906               | 1.252840  | -0.264673 |
| 16               | 6                | 0              | -2.424359               | -1.207636 | -0.553457 |
| 17               | 1                | 0              | -3.375963               | -1.628899 | -0.864352 |
| 18               | 1                | 0              | -1.580240               | -1.456043 | -1.199423 |

**Figure S5.** DFT calculation data for  $1^\dagger$  and its transition state

Ground state structure of  $1^\dagger$

E(RM062X) = -848.518936312  
 Zero-point correction = 0.351643 (Hartree/Particle)  
 Thermal correction to Energy = 0.371700  
 Thermal correction to Enthalpy = 0.372644  
 Thermal correction to Gibbs Free Energy = 0.303642  
 Sum of electronic and zero-point Energies = -848.167293  
 Sum of electronic and thermal Energies = -848.147237  
 Sum of electronic and thermal Enthalpies = -848.146292  
 Sum of electronic and thermal Free Energies = -848.215295

Standard orientation:

| Center Number | Atomic Number | Atomic Type | Coordinates (Angstroms) |           |           |
|---------------|---------------|-------------|-------------------------|-----------|-----------|
|               |               |             | X                       | Y         | Z         |
| 1             | 6             | 0           | 1.060561                | 0.492672  | 0.067751  |
| 2             | 6             | 0           | 0.631667                | -0.829997 | -0.074317 |
| 3             | 6             | 0           | -0.717081               | -1.083801 | -0.356313 |
| 4             | 6             | 0           | -1.591167               | -0.008158 | -0.456422 |
| 5             | 6             | 0           | -1.173743               | 1.316091  | -0.312559 |
| 6             | 6             | 0           | 0.170290                | 1.570826  | -0.037893 |
| 7             | 6             | 0           | -3.841196               | -0.431864 | 0.237451  |
| 8             | 8             | 0           | -2.926565               | -0.259312 | -0.763344 |
| 9             | 8             | 0           | -4.977089               | -0.639519 | -0.057574 |
| 10            | 6             | 0           | -1.212676               | -2.496005 | -0.529877 |
| 11            | 1             | 0           | -1.276123               | -3.015600 | 0.432525  |
| 12            | 1             | 0           | -2.199160               | -2.509559 | -0.989559 |
| 13            | 1             | 0           | -0.534251               | -3.072886 | -1.161404 |
| 14            | 6             | 0           | 0.667799                | 2.983101  | 0.126890  |
| 15            | 1             | 0           | 0.734610                | 3.487120  | -0.842678 |
| 16            | 1             | 0           | -0.011723               | 3.567133  | 0.750820  |
| 17            | 1             | 0           | 1.655685                | 2.994653  | 0.580022  |
| 18            | 6             | 0           | 1.608893                | -1.971593 | 0.082420  |
| 19            | 1             | 0           | 1.161610                | -2.758595 | 0.695360  |
| 20            | 1             | 0           | 1.808347                | -2.425671 | -0.895727 |
| 21            | 6             | 0           | 2.909801                | -1.494865 | 0.719213  |
| 22            | 1             | 0           | 2.756098                | -1.318641 | 1.788263  |
| 23            | 1             | 0           | 3.694425                | -2.248287 | 0.614721  |
| 24            | 8             | 0           | 2.361133                | 0.817908  | 0.334202  |
| 25            | 6             | 0           | 3.370095                | -0.178788 | 0.094750  |
| 26            | 6             | 0           | 3.596956                | -0.298166 | -1.411208 |
| 27            | 1             | 0           | 2.669595                | -0.534189 | -1.936335 |
| 28            | 1             | 0           | 3.975541                | 0.648081  | -1.801796 |
| 29            | 1             | 0           | 4.327300                | -1.082793 | -1.624213 |
| 30            | 6             | 0           | 4.611956                | 0.352784  | 0.790182  |
| 31            | 1             | 0           | 5.453428                | -0.324650 | 0.630370  |
| 32            | 1             | 0           | 4.870593                | 1.335502  | 0.391766  |
| 33            | 1             | 0           | 4.431878                | 0.449023  | 1.862314  |
| 34            | 6             | 0           | -2.156619               | 2.449727  | -0.450995 |
| 35            | 1             | 0           | -3.098373               | 2.105780  | -0.874702 |
| 36            | 1             | 0           | -2.362903               | 2.914451  | 0.519055  |
| 37            | 1             | 0           | -1.754887               | 3.230472  | -1.099939 |
| 38            | 6             | 0           | -3.328548               | -0.343620 | 1.654308  |
| 39            | 1             | 0           | -4.168591               | -0.509485 | 2.322752  |
| 40            | 1             | 0           | -2.551533               | -1.089777 | 1.829909  |
| 41            | 1             | 0           | -2.883333               | 0.635239  | 1.841931  |

$^\dagger$  Simplified structure used for calculation without  $C_{15}H_{32}$  alkyl group.

## Ground state structure of 2<sup>†</sup>

E(RM062X) = -695.883672263  
 Zero-point correction = 0.314338 (Hartree/Particle)  
 Thermal correction to Energy = 0.331069  
 Thermal correction to Enthalpy = 0.332013  
 Thermal correction to Gibbs Free Energy = 0.271751  
 Sum of electronic and zero-point Energies = -695.569334  
 Sum of electronic and thermal Energies = -695.552603  
 Sum of electronic and thermal Enthalpies = -695.551659  
 Sum of electronic and thermal Free Energies = -695.611922

Standard orientation:

| Center<br>Number | Atomic<br>Number | Atomic<br>Type | Coordinates (Angstroms) |           |           |
|------------------|------------------|----------------|-------------------------|-----------|-----------|
|                  |                  |                | X                       | Y         | Z         |
| 1                | 6                | 0              | -0.283099               | 0.458090  | -0.145796 |
| 2                | 6                | 0              | -0.027932               | -0.914811 | -0.137202 |
| 3                | 6                | 0              | 1.296994                | -1.358301 | -0.019870 |
| 4                | 6                | 0              | 2.328073                | -0.422371 | 0.021265  |
| 5                | 6                | 0              | 2.075821                | 0.951546  | -0.010932 |
| 6                | 6                | 0              | 0.755360                | 1.395518  | -0.072893 |
| 7                | 8                | 0              | 3.641709                | -0.815216 | 0.118103  |
| 8                | 6                | 0              | 1.637259                | -2.827034 | 0.065591  |
| 9                | 1                | 0              | 0.771090                | -3.429260 | 0.333071  |
| 10               | 1                | 0              | 2.022775                | -3.216236 | -0.884432 |
| 11               | 1                | 0              | 2.394934                | -3.003976 | 0.834660  |
| 12               | 6                | 0              | 0.445369                | 2.869465  | -0.087428 |
| 13               | 1                | 0              | 1.058146                | 3.403307  | 0.641581  |
| 14               | 1                | 0              | 0.655999                | 3.302600  | -1.070692 |
| 15               | 1                | 0              | -0.604079               | 3.044553  | 0.136085  |
| 16               | 6                | 0              | -1.171140               | -1.899852 | -0.255704 |
| 17               | 1                | 0              | -0.915041               | -2.679023 | -0.978114 |
| 18               | 1                | 0              | -1.327252               | -2.407563 | 0.703823  |
| 19               | 6                | 0              | -2.456883               | -1.204678 | -0.692782 |
| 20               | 1                | 0              | -2.405404               | -0.966069 | -1.759461 |
| 21               | 1                | 0              | -3.321702               | -1.854886 | -0.537521 |
| 22               | 8                | 0              | -1.551114               | 0.974663  | -0.249052 |
| 23               | 6                | 0              | -2.650527               | 0.108418  | 0.062989  |
| 24               | 6                | 0              | -2.712547               | -0.096973 | 1.576096  |
| 25               | 1                | 0              | -1.769613               | -0.489287 | 1.961746  |
| 26               | 1                | 0              | -2.908208               | 0.857488  | 2.068278  |
| 27               | 1                | 0              | -3.513087               | -0.795022 | 1.833673  |
| 28               | 6                | 0              | -3.881754               | 0.847681  | -0.434304 |
| 29               | 1                | 0              | -4.784640               | 0.276323  | -0.207791 |
| 30               | 1                | 0              | -3.952567               | 1.823263  | 0.050349  |
| 31               | 1                | 0              | -3.818285               | 1.000968  | -1.513083 |
| 32               | 6                | 0              | 3.218788                | 1.931512  | 0.034787  |
| 33               | 1                | 0              | 4.165969                | 1.426897  | -0.140643 |
| 34               | 1                | 0              | 3.091373                | 2.713146  | -0.717334 |
| 35               | 1                | 0              | 3.274258                | 2.423842  | 1.010799  |
| 36               | 1                | 0              | 3.717877                | -1.735903 | -0.140304 |

<sup>†</sup> Simplified structure used for calculation without C<sub>15</sub>H<sub>32</sub> alkyl group.

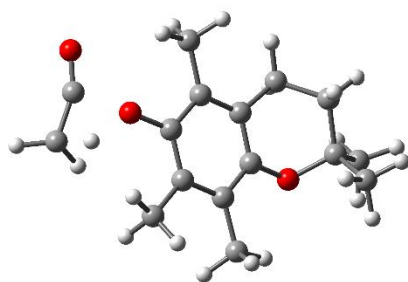

Transition state image of  $1 \rightarrow 4 + 2$

Transition state structure of  $1^\ddagger \rightarrow 4 + 2^\ddagger$

Imaginary Frequency: -1669.7490.

E(RM062X) = -848.401721573

|                                               |                             |
|-----------------------------------------------|-----------------------------|
| Zero-point correction =                       | 0.344957 (Hartree/Particle) |
| Thermal correction to Energy =                | 0.364819                    |
| Thermal correction to Enthalpy =              | 0.365763                    |
| Thermal correction to Gibbs Free Energy =     | 0.297155                    |
| Sum of electronic and zero-point Energies =   | -848.056765                 |
| Sum of electronic and thermal Energies =      | -848.036903                 |
| Sum of electronic and thermal Enthalpies =    | -848.035958                 |
| Sum of electronic and thermal Free Energies = | -848.104567                 |

Standard orientation:

| Center Number | Atomic Number | Atomic Type | Coordinates (Angstroms) |           |           |
|---------------|---------------|-------------|-------------------------|-----------|-----------|
|               |               |             | X                       | Y         | Z         |
| 1             | 6             | 0           | 0.311464                | 1.545022  | 0.080560  |
| 2             | 6             | 0           | -1.028275               | 1.409248  | -0.312785 |
| 3             | 6             | 0           | -1.571673               | 0.127753  | -0.495900 |
| 4             | 6             | 0           | -0.782920               | -1.029314 | -0.362773 |
| 5             | 6             | 0           | 0.540078                | -0.882043 | 0.043397  |
| 6             | 6             | 0           | 1.063625                | 0.390805  | 0.272670  |
| 7             | 8             | 0           | -2.889845               | -0.012276 | -0.813806 |
| 8             | 1             | 0           | -3.720235               | 0.824572  | -0.277777 |
| 9             | 6             | 0           | -4.081070               | -0.680882 | 0.564528  |
| 10            | 8             | 0           | -4.314516               | -1.796517 | 0.467180  |
| 11            | 6             | 0           | -4.288407               | 0.661315  | 0.926738  |
| 12            | 1             | 0           | -5.243116               | 0.854665  | 1.405848  |
| 13            | 1             | 0           | -3.418745               | 1.065087  | 1.446098  |
| 14            | 6             | 0           | -1.376921               | -2.383282 | -0.662730 |
| 15            | 6             | 0           | 1.530699                | -1.999922 | 0.228214  |
| 16            | 6             | 0           | -1.857670               | 2.643468  | -0.575608 |
| 17            | 6             | 0           | 0.930281                | 2.901113  | 0.298344  |
| 18            | 6             | 0           | 2.817194                | -1.592510 | -0.499638 |
| 19            | 8             | 0           | 2.345900                | 0.484498  | 0.753788  |
| 20            | 6             | 0           | 3.373221                | -0.267151 | 0.063798  |
| 21            | 1             | 0           | -1.257287               | 3.411118  | -1.066566 |
| 22            | 1             | 0           | -2.703409               | 2.420487  | -1.225910 |
| 23            | 1             | 0           | -2.247019               | 3.085583  | 0.347915  |
| 24            | 1             | 0           | 1.055206                | 3.431464  | -0.651164 |
| 25            | 1             | 0           | 0.302427                | 3.525743  | 0.938483  |
| 26            | 1             | 0           | 1.909108                | 2.798887  | 0.762022  |
| 27            | 1             | 0           | -0.710181               | -2.968524 | -1.299251 |
| 28            | 1             | 0           | -1.552927               | -2.961843 | 0.249092  |
| 29            | 1             | 0           | -2.329140               | -2.272406 | -1.178173 |
| 30            | 1             | 0           | 1.739272                | -2.135579 | 1.296105  |
| 31            | 1             | 0           | 1.153051                | -2.948149 | -0.153324 |
| 32            | 1             | 0           | 2.585878                | -1.478712 | -1.562607 |

|    |   |   |          |           |           |
|----|---|---|----------|-----------|-----------|
| 33 | 1 | 0 | 3.586055 | -2.364809 | -0.412374 |
| 34 | 6 | 0 | 4.422055 | -0.530287 | 1.134092  |
| 35 | 6 | 0 | 3.919916 | 0.616378  | -1.051342 |
| 36 | 1 | 0 | 4.697634 | 0.407010  | 1.620471  |
| 37 | 1 | 0 | 4.025768 | -1.209198 | 1.892595  |
| 38 | 1 | 0 | 4.680334 | 0.084653  | -1.629319 |
| 39 | 1 | 0 | 3.107781 | 0.900219  | -1.726240 |
| 40 | 1 | 0 | 4.362887 | 1.523109  | -0.633805 |
| 41 | 1 | 0 | 5.314759 | -0.977273 | 0.691203  |

---

† Simplified structure used for calculation without C<sub>15</sub>H<sub>32</sub> alkyl group.

**Figure S6.** DFT calculation data of **6** and its transition state

Ground state structure of **6**

E(RM062X) = -691.255415027  
Zero-point correction= 0.236042 (Hartree/Particle)  
Thermal correction to Energy= 0.251804  
Thermal correction to Enthalpy= 0.252748  
Thermal correction to Gibbs Free Energy= 0.192424  
Sum of electronic and zero-point Energies= -691.019373  
Sum of electronic and thermal Energies= -691.003611  
Sum of electronic and thermal Enthalpies= -691.002667  
Sum of electronic and thermal Free Energies= -691.062991

Standard orientation:

| Center Number | Atomic Number | Atomic Type | Coordinates (Angstroms) |           |           |
|---------------|---------------|-------------|-------------------------|-----------|-----------|
|               |               |             | X                       | Y         | Z         |
| 1             | 6             | 0           | 1.638646                | 1.290650  | 0.009154  |
| 2             | 6             | 0           | 2.311849                | -0.056226 | 0.100299  |
| 3             | 6             | 0           | 1.464417                | -1.259614 | -0.054193 |
| 4             | 6             | 0           | 0.140542                | -1.119873 | -0.290424 |
| 5             | 6             | 0           | -0.472026               | 0.210974  | -0.360972 |
| 6             | 6             | 0           | 0.196316                | 1.367247  | -0.228511 |
| 7             | 8             | 0           | -1.838881               | 0.244807  | -0.638032 |
| 8             | 6             | 0           | -2.687053               | -0.047579 | 0.389520  |
| 9             | 6             | 0           | -4.109735               | -0.001232 | -0.086873 |
| 10            | 1             | 0           | -4.259363               | -0.775618 | -0.841369 |
| 11            | 1             | 0           | -4.776616               | -0.164359 | 0.755049  |
| 12            | 1             | 0           | -4.311663               | 0.961558  | -0.557195 |
| 13            | 8             | 0           | -2.312280               | -0.309450 | 1.491708  |
| 14            | 6             | 0           | -0.762682               | -2.304502 | -0.495771 |
| 15            | 1             | 0           | -1.339017               | -2.496020 | 0.414800  |
| 16            | 1             | 0           | -1.470832               | -2.112999 | -1.303915 |
| 17            | 1             | 0           | -0.193832               | -3.198923 | -0.738834 |
| 18            | 6             | 0           | 2.157817                | -2.589701 | 0.052739  |
| 19            | 1             | 0           | 1.622675                | -3.264977 | 0.722654  |
| 20            | 1             | 0           | 2.235782                | -3.075581 | -0.924502 |
| 21            | 1             | 0           | 3.166427                | -2.440717 | 0.432871  |
| 22            | 6             | 0           | -0.472784               | 2.707483  | -0.306267 |
| 23            | 1             | 0           | -1.529150               | 2.604651  | -0.542655 |
| 24            | 1             | 0           | -0.376474               | 3.238013  | 0.644893  |
| 25            | 1             | 0           | -0.006753               | 3.324124  | -1.079072 |
| 26            | 6             | 0           | 2.410406                | 2.373025  | 0.170801  |
| 27            | 8             | 0           | 3.508860                | -0.140831 | 0.288547  |
| 28            | 1             | 0           | 2.012901                | 3.379318  | 0.128974  |
| 29            | 1             | 0           | 3.470042                | 2.241400  | 0.353496  |

Ground state structure of **8**

E(RM062X) = -538.618811938  
Zero-point correction = 0.197824 (Hartree/Particle)  
Thermal correction to Energy = 0.209617  
Thermal correction to Enthalpy = 0.210562  
Thermal correction to Gibbs Free Energy = 0.160403  
Sum of electronic and zero-point Energies = -538.420988  
Sum of electronic and thermal Energies = -538.409194  
Sum of electronic and thermal Enthalpies = -538.408250  
Sum of electronic and thermal Free Energies = -538.458409

Standard orientation:

| Center Number | Atomic Number | Atomic Type | Coordinates (Angstroms) |           |           |
|---------------|---------------|-------------|-------------------------|-----------|-----------|
|               |               |             | X                       | Y         | Z         |
| 1             | 6             | 0           | 1.030883                | -1.112045 | -0.003198 |
| 2             | 6             | 0           | -0.434815               | -1.468541 | 0.004811  |
| 3             | 6             | 0           | -1.414396               | -0.356234 | 0.001811  |
| 4             | 6             | 0           | -0.973073               | 0.919557  | -0.001491 |
| 5             | 6             | 0           | 0.465755                | 1.231678  | -0.001329 |
| 6             | 6             | 0           | 1.434185                | 0.291780  | 0.009974  |
| 7             | 8             | 0           | 0.694505                | 2.574115  | -0.011066 |
| 8             | 6             | 0           | -1.899904               | 2.101948  | -0.004249 |
| 9             | 1             | 0           | -1.706769               | 2.733565  | 0.865887  |
| 10            | 1             | 0           | -1.713534               | 2.723230  | -0.883321 |
| 11            | 1             | 0           | -2.942863               | 1.795414  | 0.001688  |
| 12            | 6             | 0           | -2.869714               | -0.738090 | 0.004128  |
| 13            | 1             | 0           | -3.380318               | -0.348429 | 0.887953  |
| 14            | 1             | 0           | -3.382859               | -0.347917 | -0.877998 |
| 15            | 1             | 0           | -2.958021               | -1.822317 | 0.004200  |
| 16            | 6             | 0           | 2.904772                | 0.606326  | 0.025230  |
| 17            | 1             | 0           | 3.128447                | 1.670079  | 0.121317  |
| 18            | 1             | 0           | 3.392136                | 0.109957  | 0.868468  |
| 19            | 1             | 0           | 3.389721                | 0.254386  | -0.889869 |
| 20            | 6             | 0           | 1.898767                | -2.133475 | -0.029933 |
| 21            | 8             | 0           | -0.795567               | -2.628221 | 0.011721  |
| 22            | 1             | 0           | 2.971170                | -1.986515 | -0.043418 |
| 23            | 1             | 0           | 1.518043                | -3.146968 | -0.041667 |
| 24            | 1             | 0           | 1.638581                | 2.740930  | -0.053011 |

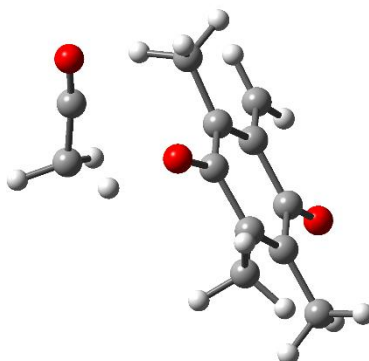

Transitions state image of **6** → **4** + **8**

### Transition state structure of **6** → **4** + **8**

Imaginary Frequency: -886.8120.  
E(RM062X) = -691.142913169  
Zero-point correction = 0.228994 (Hartree/Particle)  
Thermal correction to Energy = 0.245075  
Thermal correction to Enthalpy = 0.246020  
Thermal correction to Gibbs Free Energy = 0.184954  
Sum of electronic and zero-point Energies = -690.913920  
Sum of electronic and thermal Energies = -690.897838  
Sum of electronic and thermal Enthalpies = -690.896894  
Sum of electronic and thermal Free Energies = -690.957959

Standard orientation:

| Center<br>Number | Atomic<br>Number | Atomic<br>Type | Coordinates (Angstroms) |           |           |
|------------------|------------------|----------------|-------------------------|-----------|-----------|
|                  |                  |                | X                       | Y         | Z         |
| 1                | 6                | 0              | 2.062301                | -0.740116 | -0.032863 |
| 2                | 6                | 0              | 0.859372                | -1.274797 | 0.264801  |
| 3                | 6                | 0              | -0.366336               | -0.443774 | 0.444835  |
| 4                | 6                | 0              | -0.288484               | 0.926184  | 0.383844  |
| 5                | 6                | 0              | 0.973130                | 1.575833  | 0.065969  |
| 6                | 6                | 0              | 2.204983                | 0.729829  | -0.153238 |
| 7                | 8                | 0              | -1.488696               | -1.092041 | 0.601300  |
| 8                | 1                | 0              | -2.038285               | -1.315044 | -0.871127 |
| 9                | 6                | 0              | -3.506101               | -0.176497 | -0.494674 |
| 10               | 8                | 0              | -4.302903               | 0.016581  | 0.271477  |
| 11               | 6                | 0              | -2.629112               | -0.536344 | -1.525041 |
| 12               | 1                | 0              | -3.160008               | -0.794197 | -2.439480 |
| 13               | 1                | 0              | -1.847951               | 0.230481  | -1.633316 |
| 14               | 6                | 0              | -1.494985               | 1.756501  | 0.718996  |
| 15               | 1                | 0              | -2.049687               | 2.116074  | -0.164681 |
| 16               | 1                | 0              | -2.175196               | 1.181244  | 1.348327  |
| 17               | 1                | 0              | -1.210968               | 2.650108  | 1.278814  |
| 18               | 6                | 0              | 1.130728                | 2.902027  | -0.084000 |
| 19               | 6                | 0              | 0.661687                | -2.755281 | 0.430000  |
| 20               | 1                | 0              | -0.072844               | -2.943424 | 1.212115  |
| 21               | 1                | 0              | 0.257794                | -3.191774 | -0.490514 |
| 22               | 1                | 0              | 1.595532                | -3.264044 | 0.663359  |
| 23               | 6                | 0              | 3.308563                | -1.557109 | -0.244060 |
| 24               | 1                | 0              | 3.682371                | -1.958423 | 0.702952  |
| 25               | 1                | 0              | 3.124325                | -2.400277 | -0.912712 |
| 26               | 1                | 0              | 4.087302                | -0.927995 | -0.670823 |
| 27               | 8                | 0              | 3.278201                | 1.236100  | -0.418512 |
| 28               | 1                | 0              | 0.311746                | 3.600869  | 0.030149  |
| 29               | 1                | 0              | 2.108581                | 3.292539  | -0.334587 |



**Figure S7.** DFT calculation data for chroman retro Diels-Alder transition state for **1**<sup>†</sup>

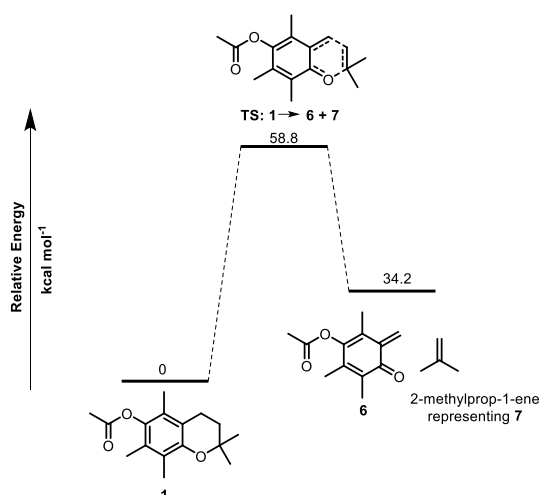

Calculated (gas phase at the M06-2X/6-311G (d,p) level) energy profile for the retro Diels-Alder pyrolysis of vitamin E acetate (calculation version). Relative free energies (kcal mol<sup>-1</sup>) for starting materials, transition state and products formed for the pyrolysis of **1**<sup>†</sup> leading to the formation of **6** and **7**<sup>††</sup>.

<sup>†</sup> Simplified structure used for calculation without C<sub>15</sub>H<sub>32</sub> alkyl group. <sup>††</sup> 2-Methylprop-1-ene representing **7**.

Ground state structure of 2-methylprop-1-ene (representing **7**).

```
E(RM062X) = -157.179383224
Zero-point correction= 0.108660 (Hartree/Particle)
Thermal correction to Energy = 0.113879
Thermal correction to Enthalpy = 0.114824
Thermal correction to Gibbs Free Energy = 0.081493
Sum of electronic and zero-point Energies = -157.070724
Sum of electronic and thermal Energies = -157.065504
Sum of electronic and thermal Enthalpies = -157.064560
Sum of electronic and thermal Free Energies = -157.097890
```

Standard orientation:

| Center Number | Atomic Number | Atomic Type | Coordinates (Angstroms) |           |           |
|---------------|---------------|-------------|-------------------------|-----------|-----------|
|               |               |             | X                       | Y         | Z         |
| 1             | 6             | 0           | 0.001250                | -1.455560 | -0.000009 |
| 2             | 6             | 0           | 0.000028                | -0.126264 | -0.000013 |
| 3             | 6             | 0           | 1.270638                | 0.679225  | 0.000011  |
| 4             | 1             | 0           | 2.153773                | 0.040007  | -0.000100 |
| 5             | 1             | 0           | 1.311438                | 1.330002  | -0.879051 |
| 6             | 1             | 0           | 1.311589                | 1.329940  | 0.879096  |
| 7             | 6             | 0           | -1.271800               | 0.677270  | 0.000016  |
| 8             | 1             | 0           | -1.313397               | 1.328320  | 0.878849  |
| 9             | 1             | 0           | -1.313684               | 1.327697  | -0.879257 |
| 10            | 1             | 0           | -2.154080               | 0.036912  | 0.000323  |
| 11            | 1             | 0           | 0.927383                | -2.019514 | 0.000036  |
| 12            | 1             | 0           | -0.923721               | -2.021392 | 0.000071  |

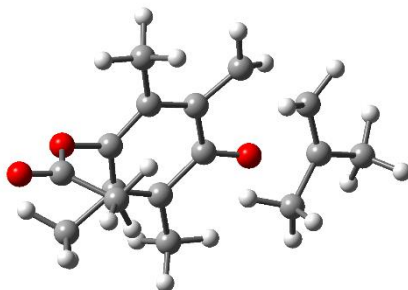

Transitions state image representing  $1 \rightarrow 6 + 7$

Transition state structure of  $1^\ddagger \rightarrow 6 + 7^\ddagger$

Imaginary Frequency: -398.8034.

E(RM062X) = -848.418968657

|                                               |                             |
|-----------------------------------------------|-----------------------------|
| Zero-point correction=                        | 0.346404 (Hartree/Particle) |
| Thermal correction to Energy =                | 0.367276                    |
| Thermal correction to Enthalpy =              | 0.368220                    |
| Thermal correction to Gibbs Free Energy =     | 0.297471                    |
| Sum of electronic and zero-point Energies =   | -848.072565                 |
| Sum of electronic and thermal Energies =      | -848.051692                 |
| Sum of electronic and thermal Enthalpies =    | -848.050748                 |
| Sum of electronic and thermal Free Energies = | -848.121498                 |

Standard orientation:

| Center Number | Atomic Number | Atomic Type | Coordinates (Angstroms) |           |           |
|---------------|---------------|-------------|-------------------------|-----------|-----------|
|               |               |             | X                       | Y         | Z         |
| 1             | 6             | 0           | -2.770997               | -1.863904 | 0.410401  |
| 2             | 6             | 0           | -1.774072               | -1.444261 | -1.344134 |
| 3             | 6             | 0           | -0.727366               | -0.559637 | -1.082001 |
| 4             | 6             | 0           | -1.150724               | 0.798246  | -0.782195 |
| 5             | 6             | 0           | -3.163314               | -0.648196 | 0.926375  |
| 6             | 6             | 0           | 0.641940                | -0.953758 | -0.946331 |
| 7             | 6             | 0           | -0.127152               | 1.780199  | -0.439513 |
| 8             | 6             | 0           | 1.182064                | 1.389294  | -0.387710 |
| 9             | 6             | 0           | 1.540050                | 0.014960  | -0.614014 |
| 10            | 8             | 0           | -2.370488               | 1.051556  | -0.732664 |
| 11            | 1             | 0           | -1.931147               | -2.376050 | 0.868544  |
| 12            | 1             | 0           | -3.514242               | -2.497048 | -0.062753 |
| 13            | 1             | 0           | -2.669044               | -1.018852 | -1.779611 |
| 14            | 1             | 0           | -1.557305               | -2.476747 | -1.596290 |
| 15            | 6             | 0           | -2.266920               | 0.040433  | 1.903486  |
| 16            | 1             | 0           | -2.509502               | 1.098247  | 2.001620  |
| 17            | 1             | 0           | -2.342116               | -0.438890 | 2.885773  |
| 18            | 1             | 0           | -1.221647               | -0.053643 | 1.579735  |
| 19            | 6             | 0           | -4.525795               | -0.093204 | 0.661680  |
| 20            | 1             | 0           | -5.184249               | -0.324416 | 1.507709  |
| 21            | 1             | 0           | -4.484006               | 0.987881  | 0.537994  |
| 22            | 1             | 0           | -4.961277               | -0.534481 | -0.236232 |
| 23            | 6             | 0           | 1.059393                | -2.378626 | -1.186417 |
| 24            | 1             | 0           | 0.599494                | -3.053117 | -0.456285 |
| 25            | 1             | 0           | 0.743825                | -2.709358 | -2.178835 |
| 26            | 1             | 0           | 2.140582                | -2.489116 | -1.125606 |
| 27            | 6             | 0           | -0.582845               | 3.188068  | -0.166489 |
| 28            | 1             | 0           | -1.670977               | 3.218171  | -0.172243 |
| 29            | 1             | 0           | -0.224931               | 3.547431  | 0.801490  |

|    |   |   |           |           |           |
|----|---|---|-----------|-----------|-----------|
| 30 | 1 | 0 | -0.218737 | 3.880399  | -0.931000 |
| 31 | 6 | 0 | 2.302132  | 2.349150  | -0.082728 |
| 32 | 1 | 0 | 1.962648  | 3.381991  | -0.116886 |
| 33 | 1 | 0 | 2.725482  | 2.166945  | 0.911333  |
| 34 | 1 | 0 | 3.116193  | 2.217840  | -0.797375 |
| 35 | 8 | 0 | 2.896123  | -0.291536 | -0.528037 |
| 36 | 6 | 0 | 3.438048  | -0.662086 | 0.670843  |
| 37 | 8 | 0 | 4.611250  | -0.859986 | 0.732630  |
| 38 | 6 | 0 | 2.484595  | -0.815673 | 1.832797  |
| 39 | 1 | 0 | 1.920939  | 0.103202  | 2.005253  |
| 40 | 1 | 0 | 1.759926  | -1.605216 | 1.622884  |
| 41 | 1 | 0 | 3.070788  | -1.071470 | 2.711044  |

-----

† Simplified structure used for calculation without C<sub>15</sub>H<sub>32</sub> alkyl group. ††2-Methylprop-1-ene representing **7**.

Figure S8. APCI-MS cone-voltage study of vaped vitamin E acetate **1**

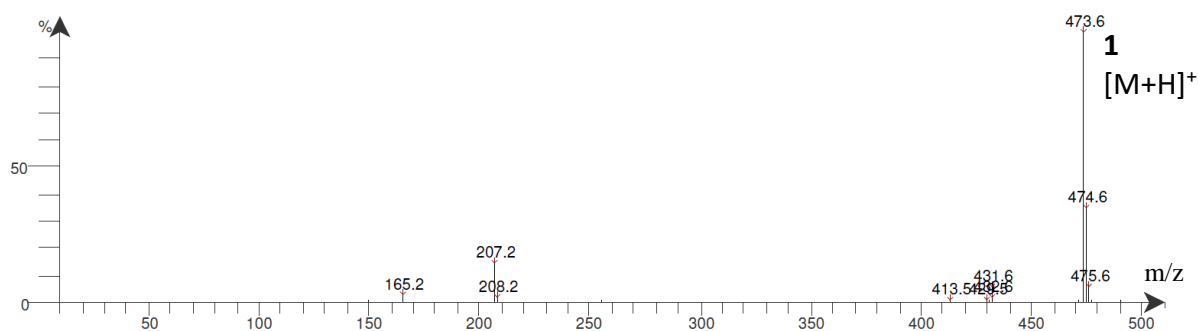

Fig. S8a: 5 eV, APCI (positive mode).

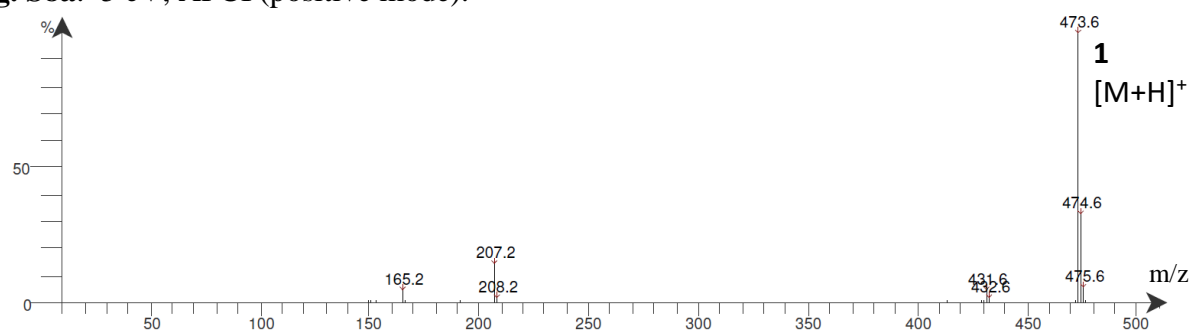

Fig. S8b: 10 eV, APCI (positive mode).

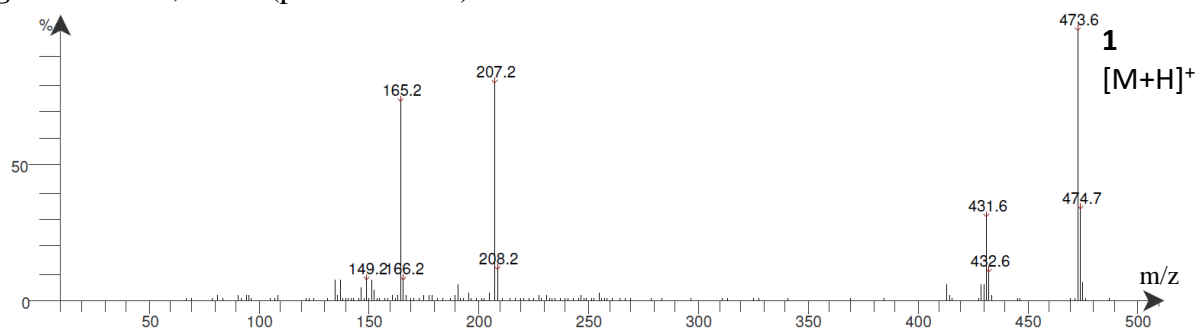

Fig. S8c: 20 eV, APCI (positive mode).

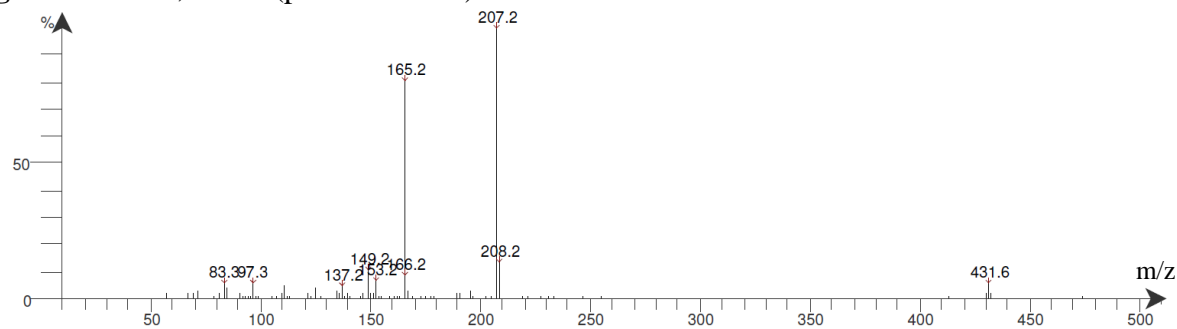

Fig. S8d: 30 eV, APCI (positive mode).

Figure S9.  $^1\text{H}$  NMR spectrum of isolated mixture from vaped **1** and pure vitamin E acetate **1**

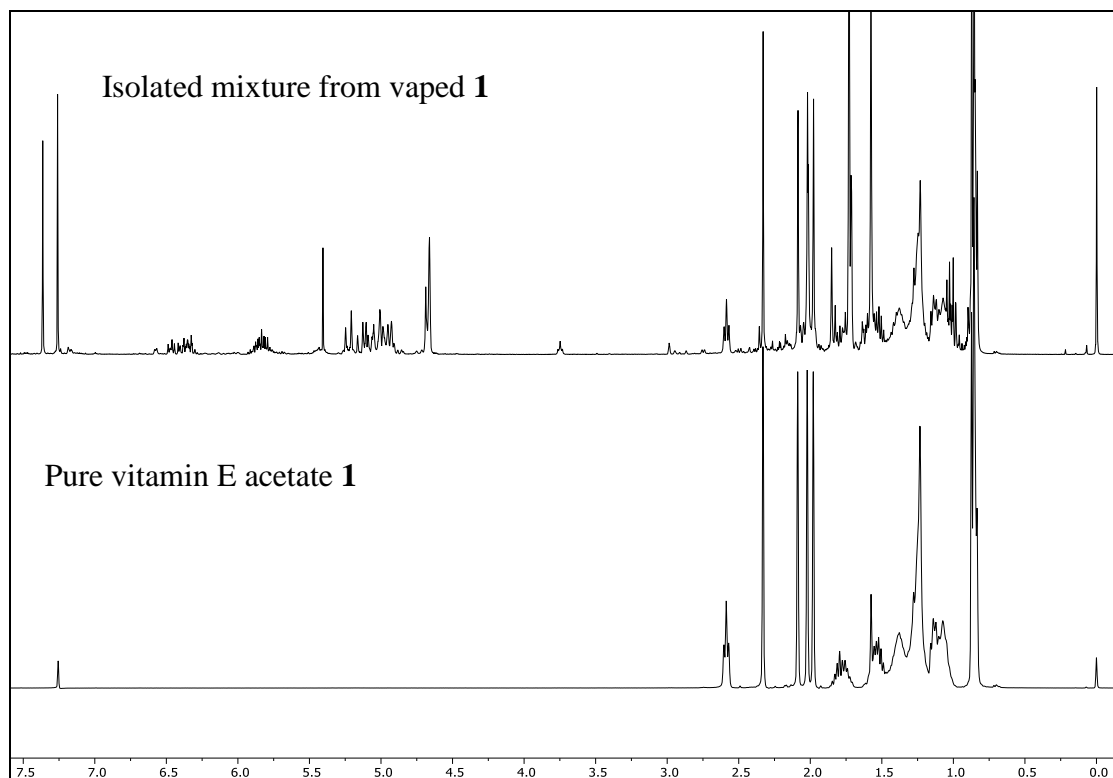

**Figure S10**  $^1\text{H}$  NMR spectrum of the non-volatile component (NVC) of isolated mixture from vaped **1**

$^1\text{H}$  NMR ( $\text{CDCl}_3$ , 400 MHz)

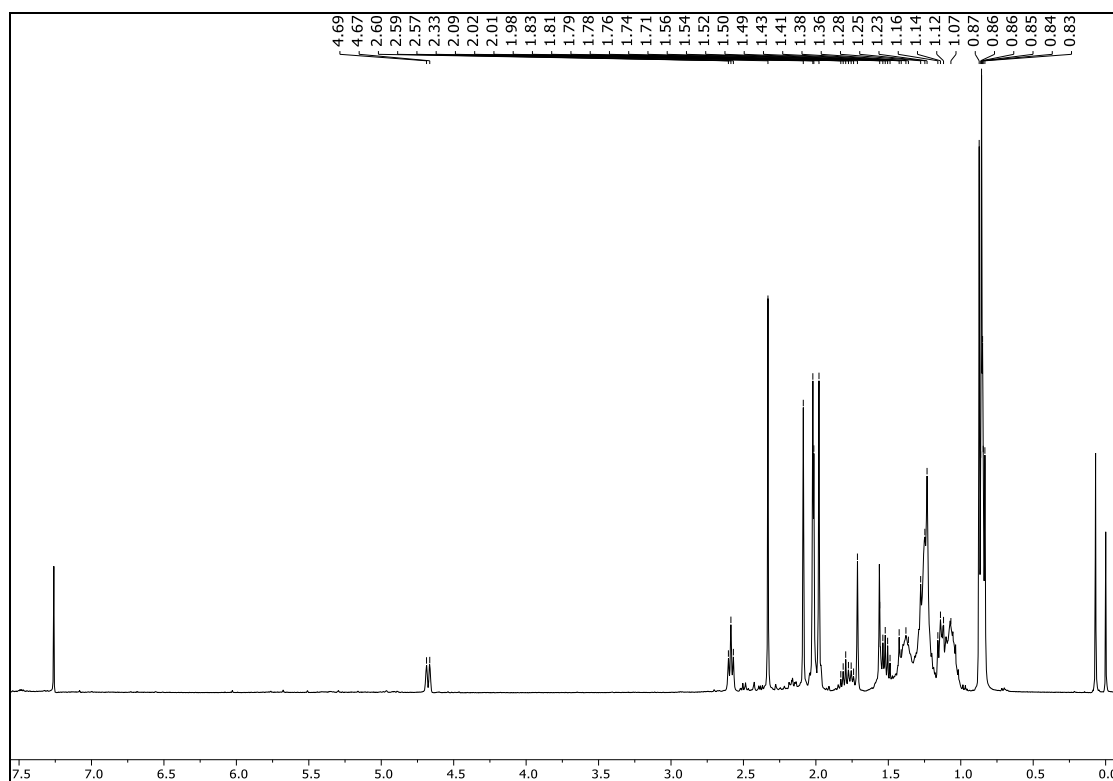

$^{13}\text{C}$  NMR ( $\text{CDCl}_3$ , 100 MHz)

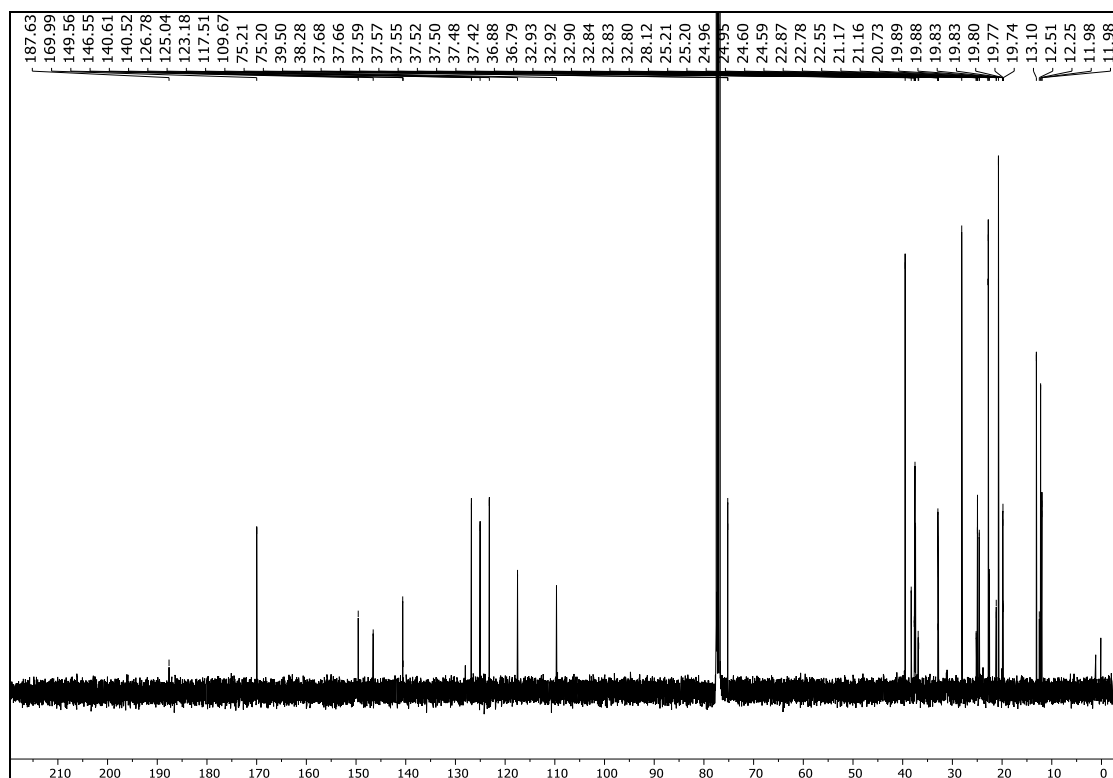

**Figure S11.** Identification of duroquinone **8** and prist-1-ene **7** in non-volatile component (NVC) of isolated mixture from vaped **1**.

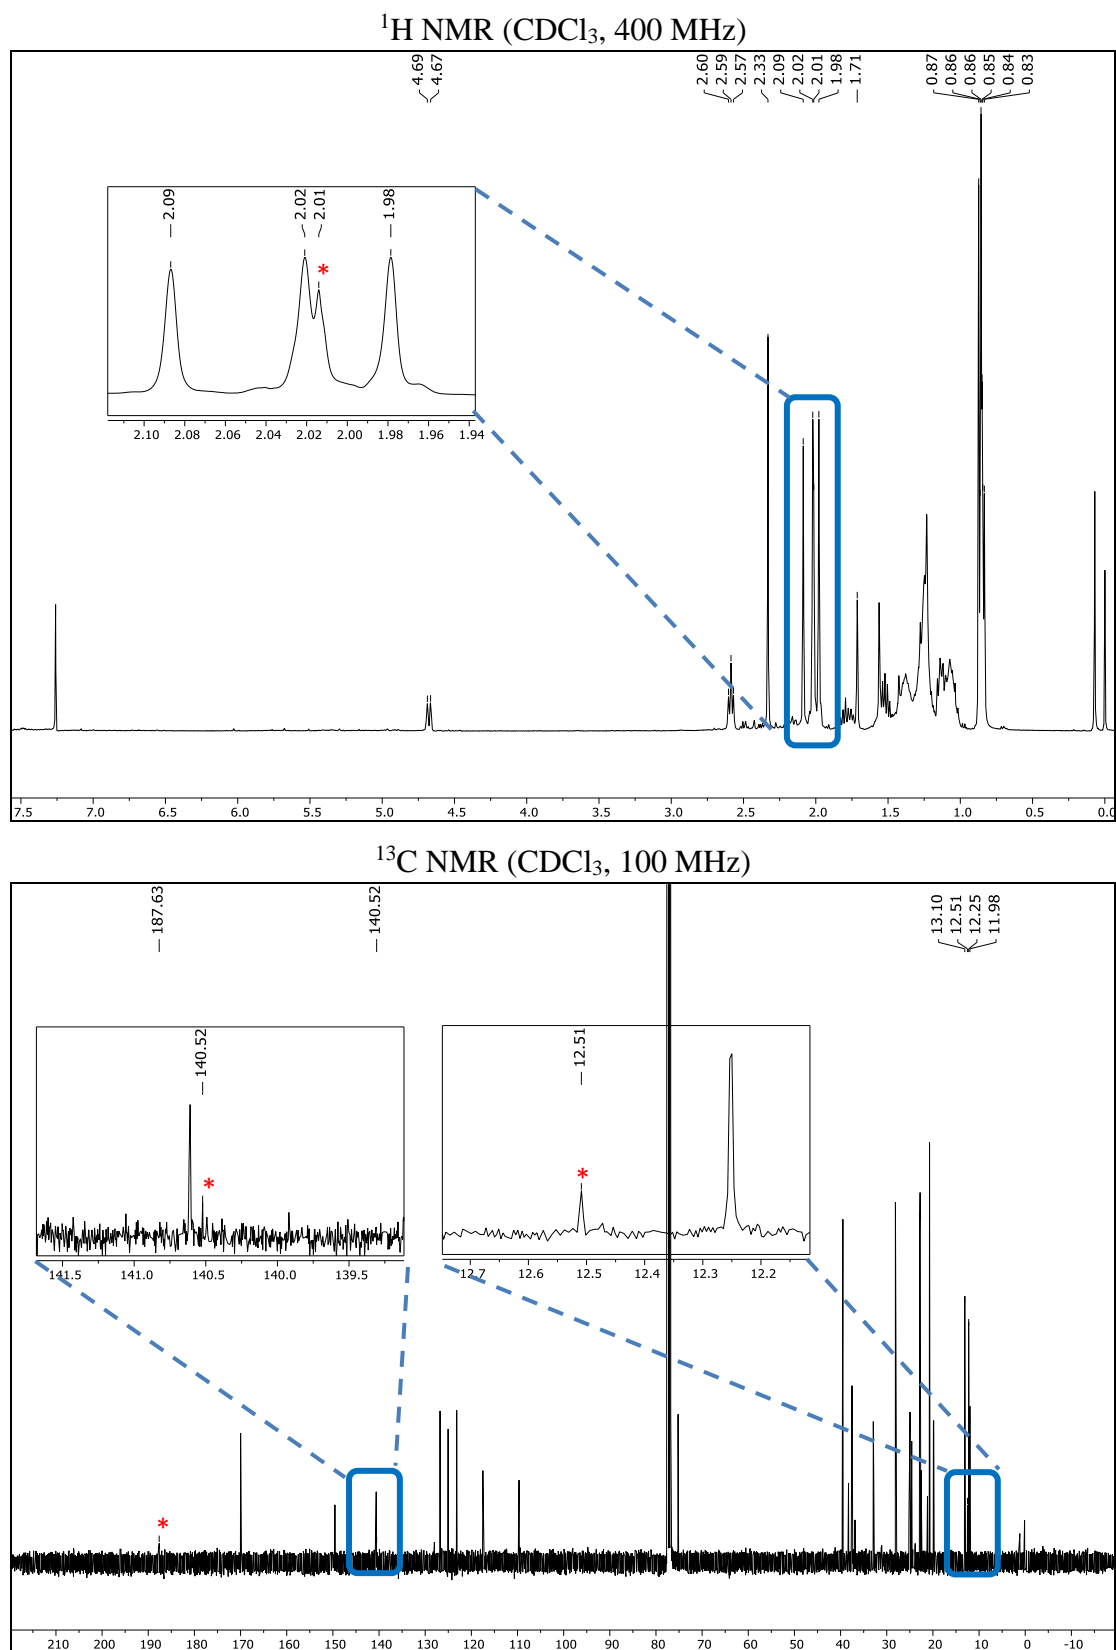

\*: Duroquinone **8**.  $^1\text{H NMR}$  (400 MHz,  $\text{CDCl}_3$ )  $\delta$ :2.01 (s, 12H) ppm.  $^{13}\text{C NMR}$  (100 MHz,  $\text{CDCl}_3$ )  $\delta$ :187.6, 140.5, 12.5 ppm.

# $^1\text{H}$ COSY

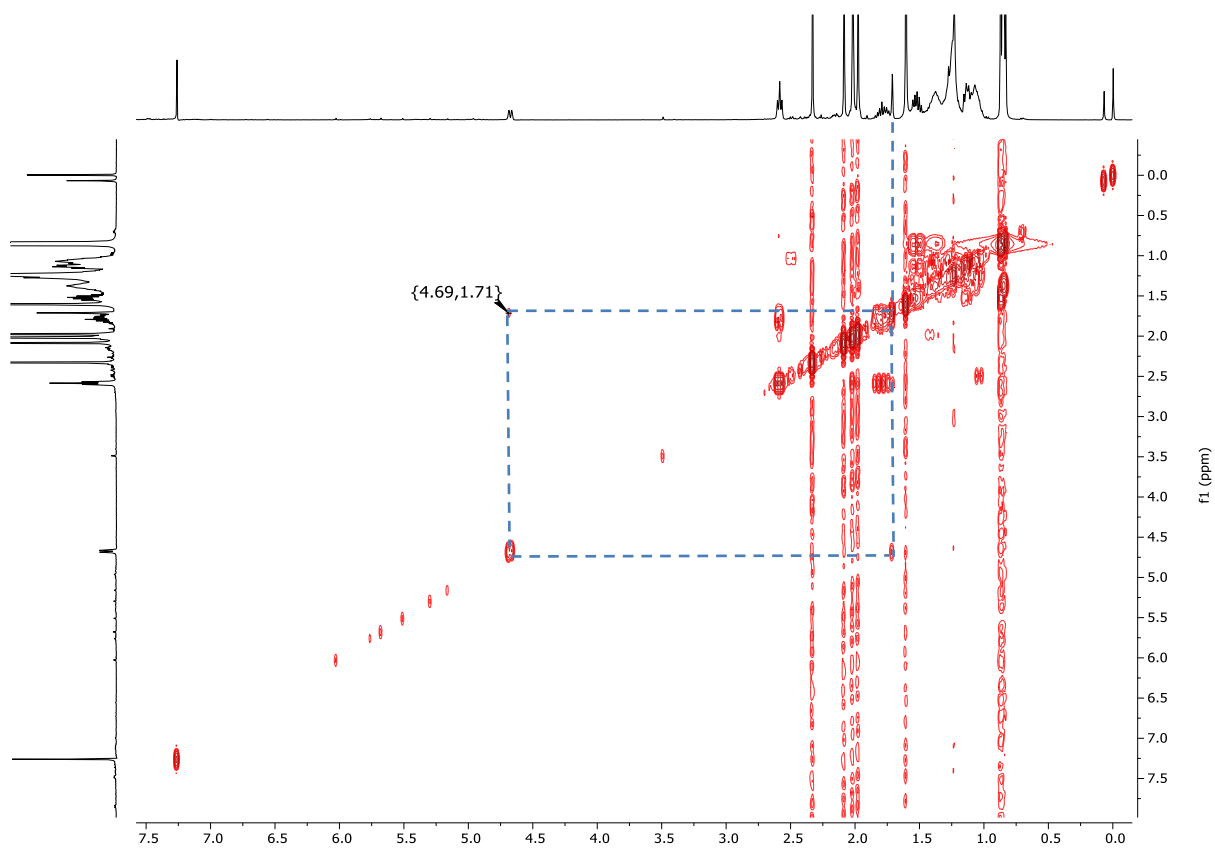

# HSQC

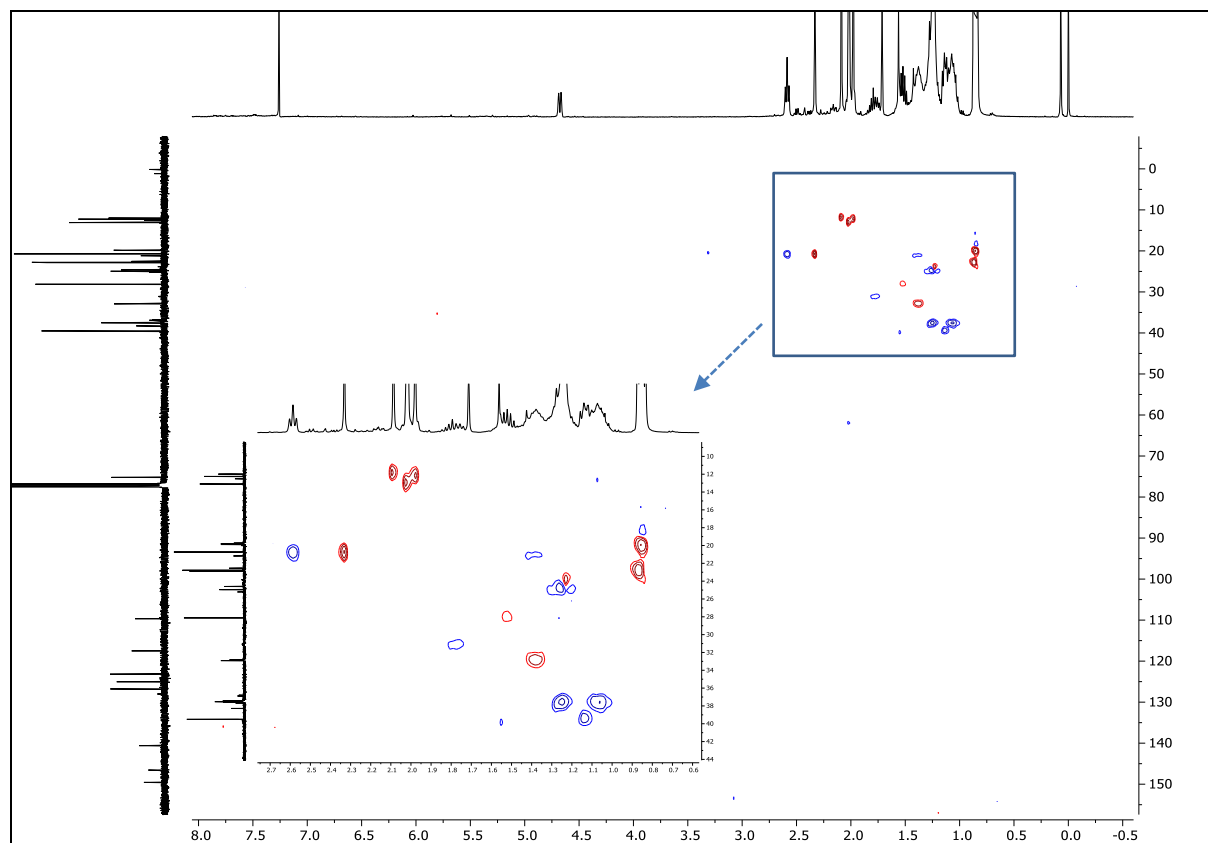



# HMBC

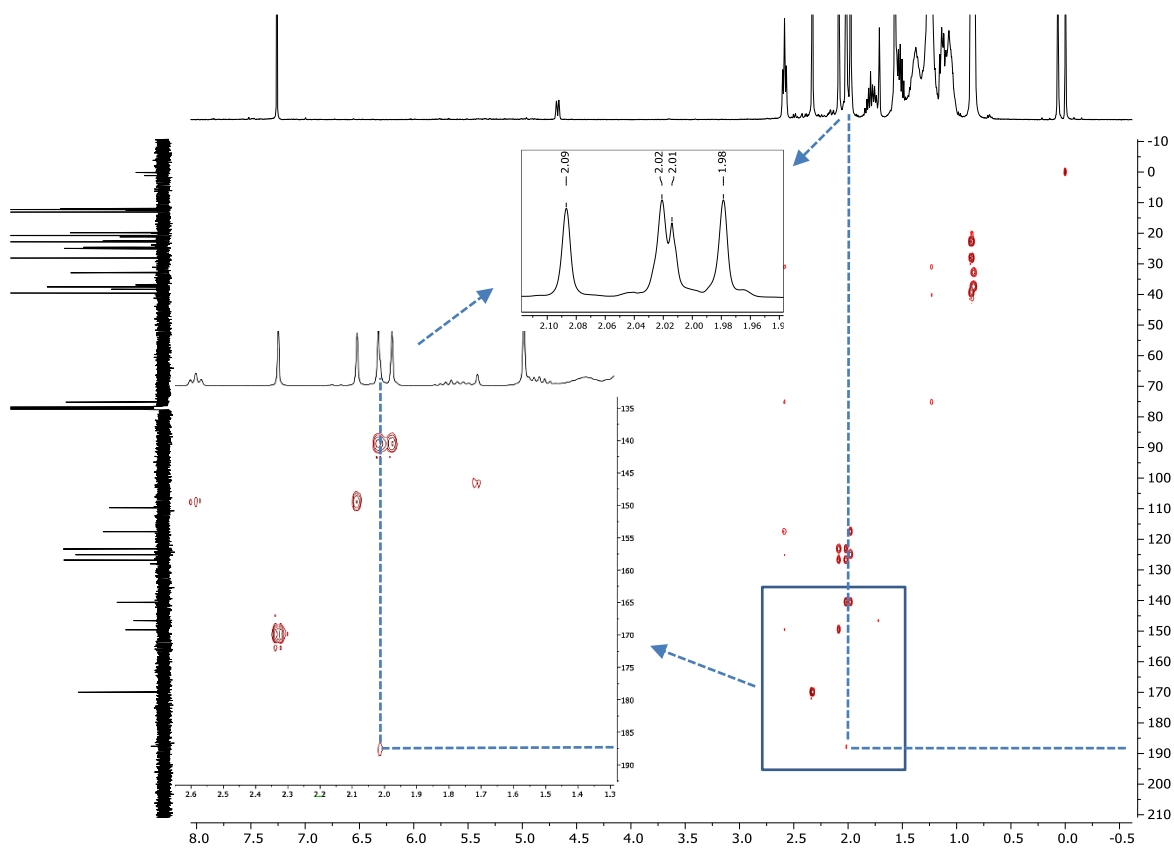

Confirmatory spiking NMR spectra. Top spectrum: vape mixture containing duroquinone **8** (red asterisk). Bottom spectrum: vaped mixture containing duroquinone following spiking with pure duroquinone **8**.

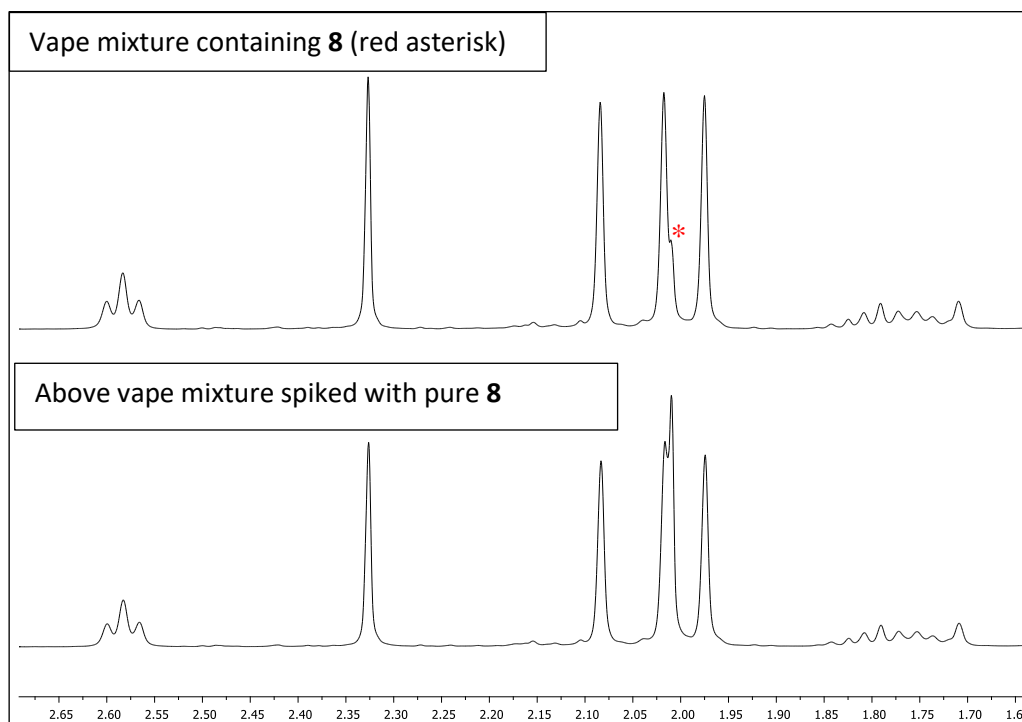

**Figure S12.** HPLC identification of duroquinone **8** in non-volatile component (NVC) of isolated mixture from vaped **1**

HPLC of NVC from vaped **1** with duroquinone **8** identified at RT of 15.1 min

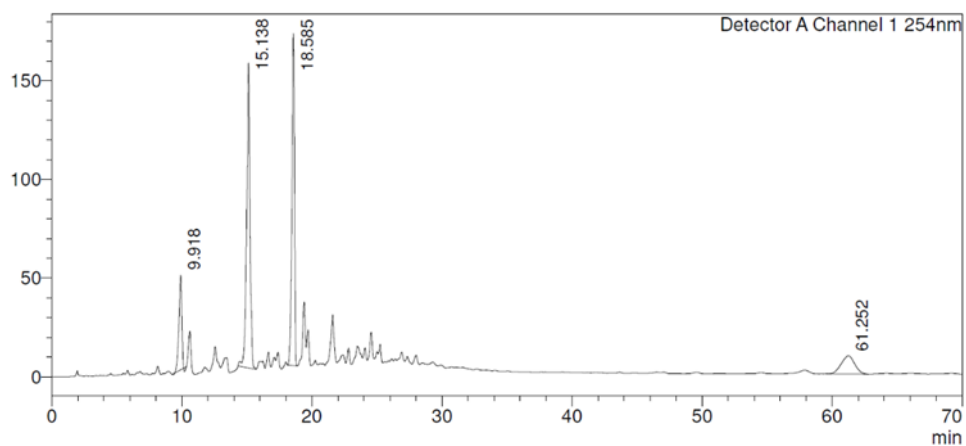

HPLC of NVC from vaped **1** spiked with pure **8**

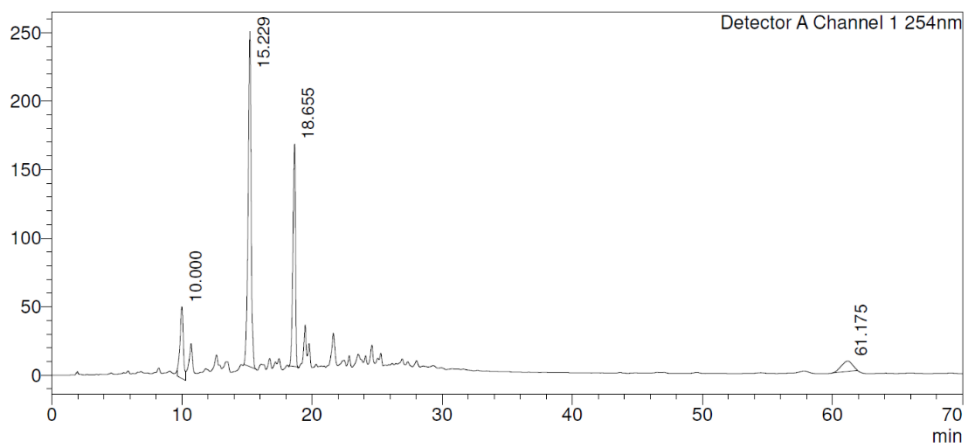

HPLC of pure duroquinone **8** (RT 15.1 min)

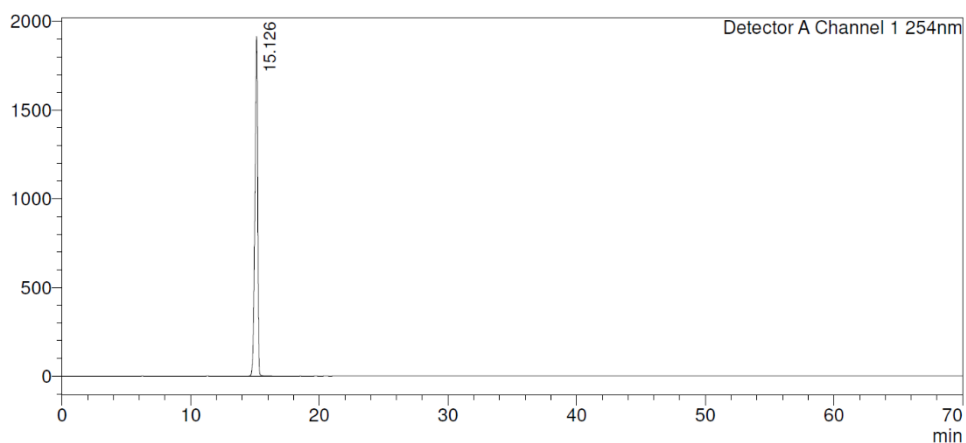

**Figure S13.** GC-MS identification of duroquinone **8** in non-volatile component (NVC) of isolated mixture from vaped **1**

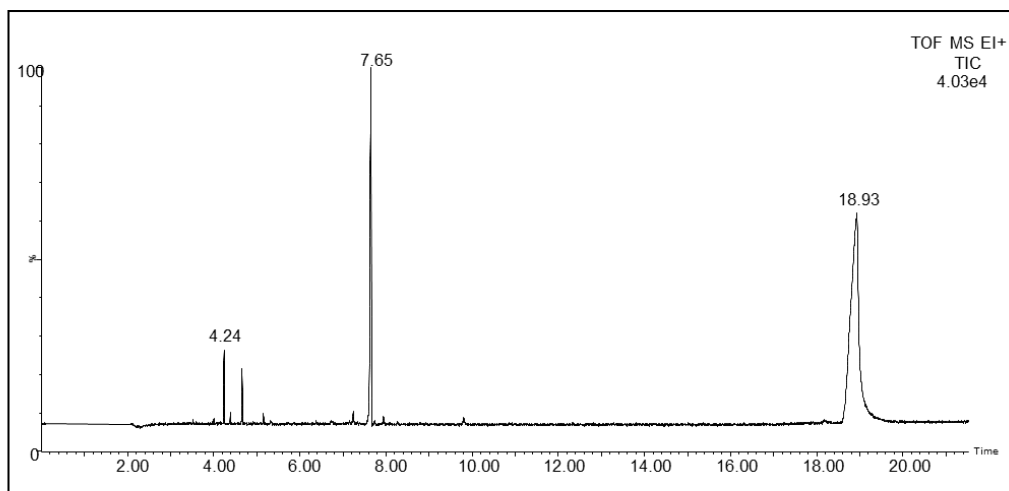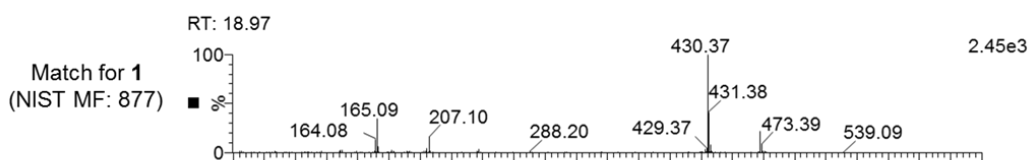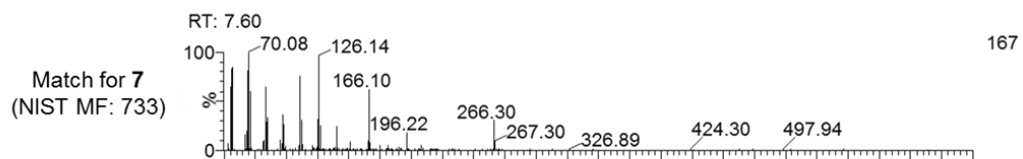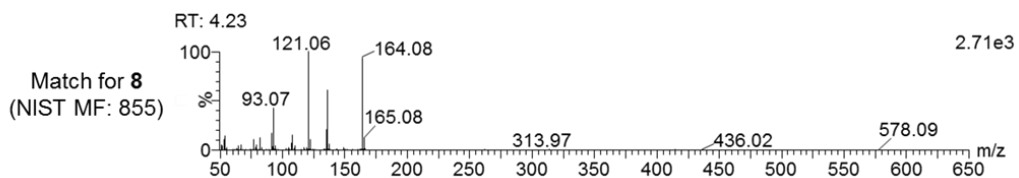

Accurate mass report for duroquinone **8**

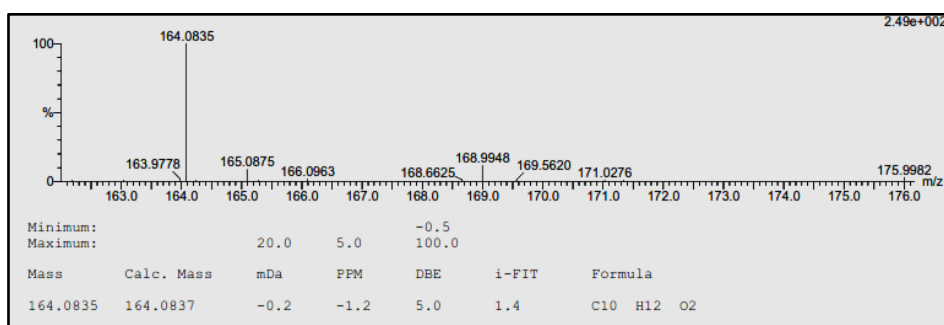

**Figure S14.** Identification of benzene, ethene, propene, butadiene, THF, 2-methylprop-1-ene in volatile component (VC) of isolated mixture from vaped **1**.

$^1\text{H NMR}$  ( $\text{CDCl}_3$ , 400 MHz)

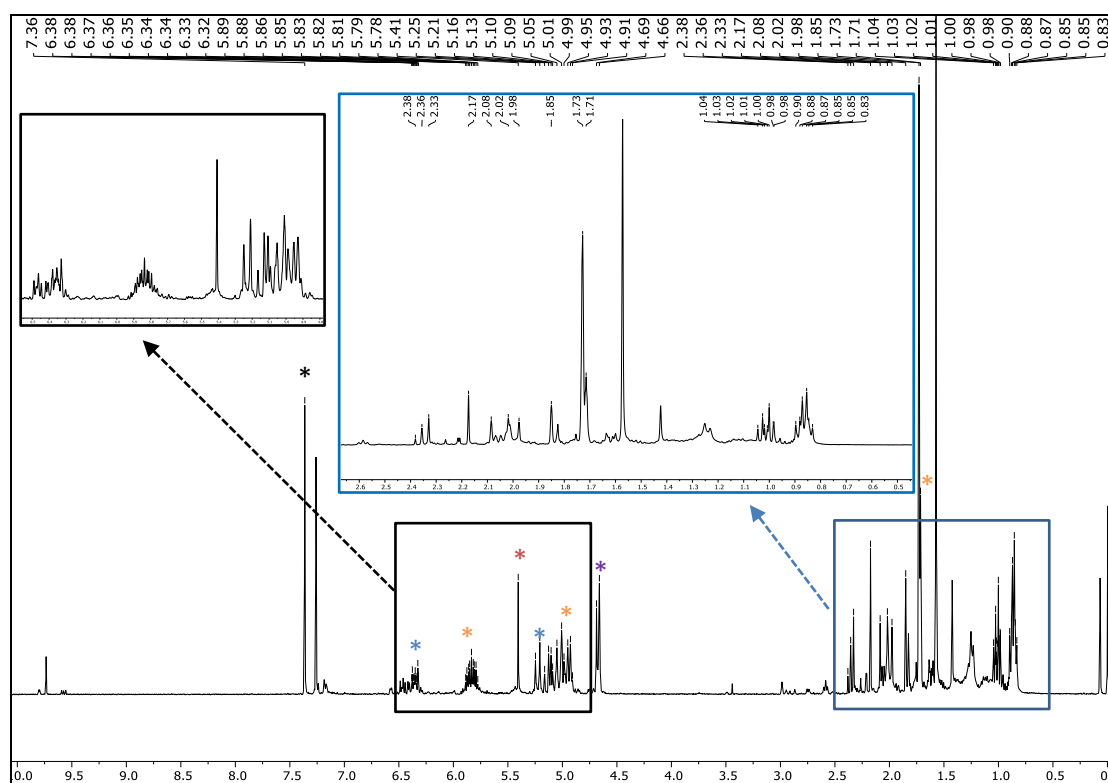

$^1\text{H COSY}$

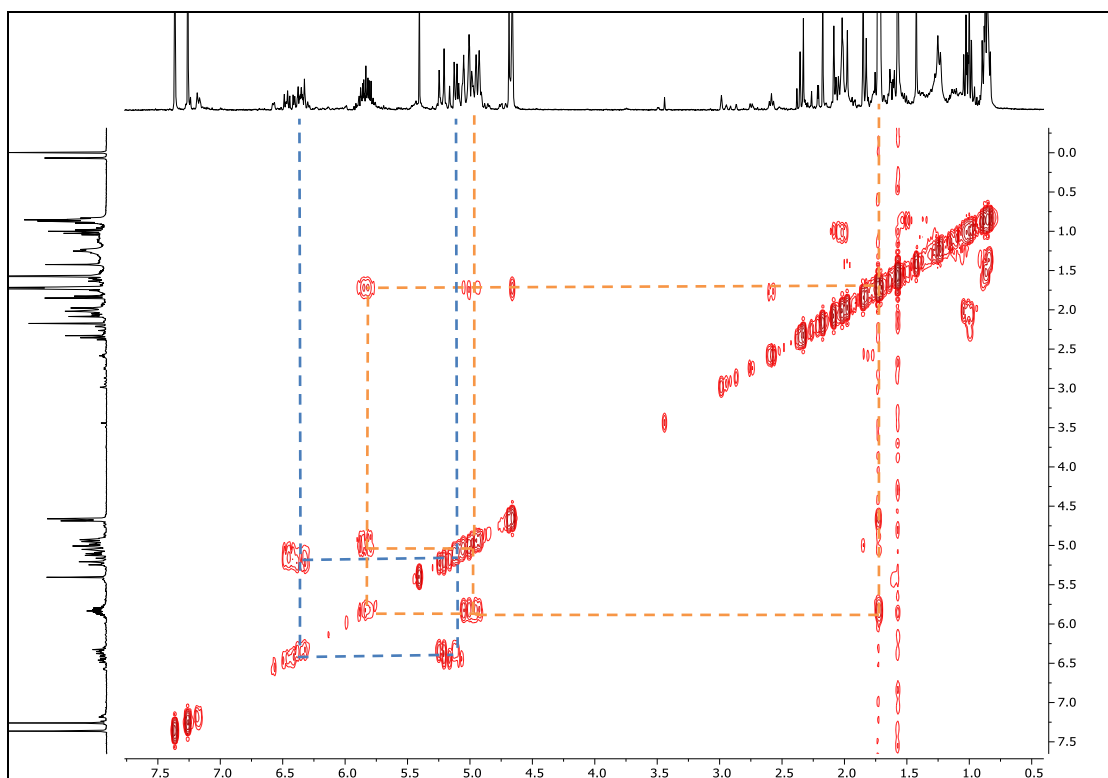

# HSQC

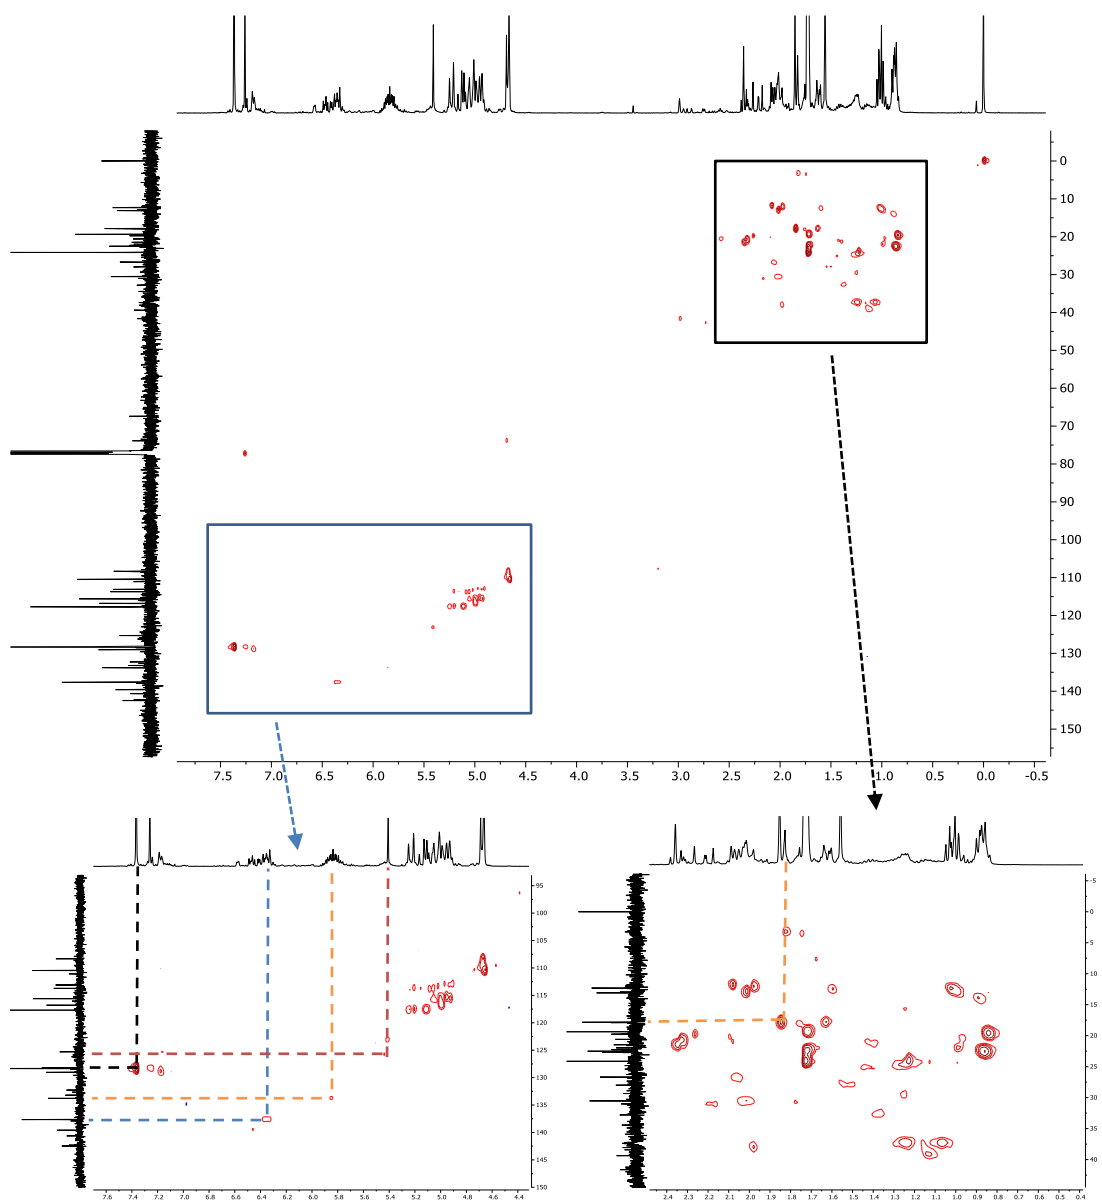

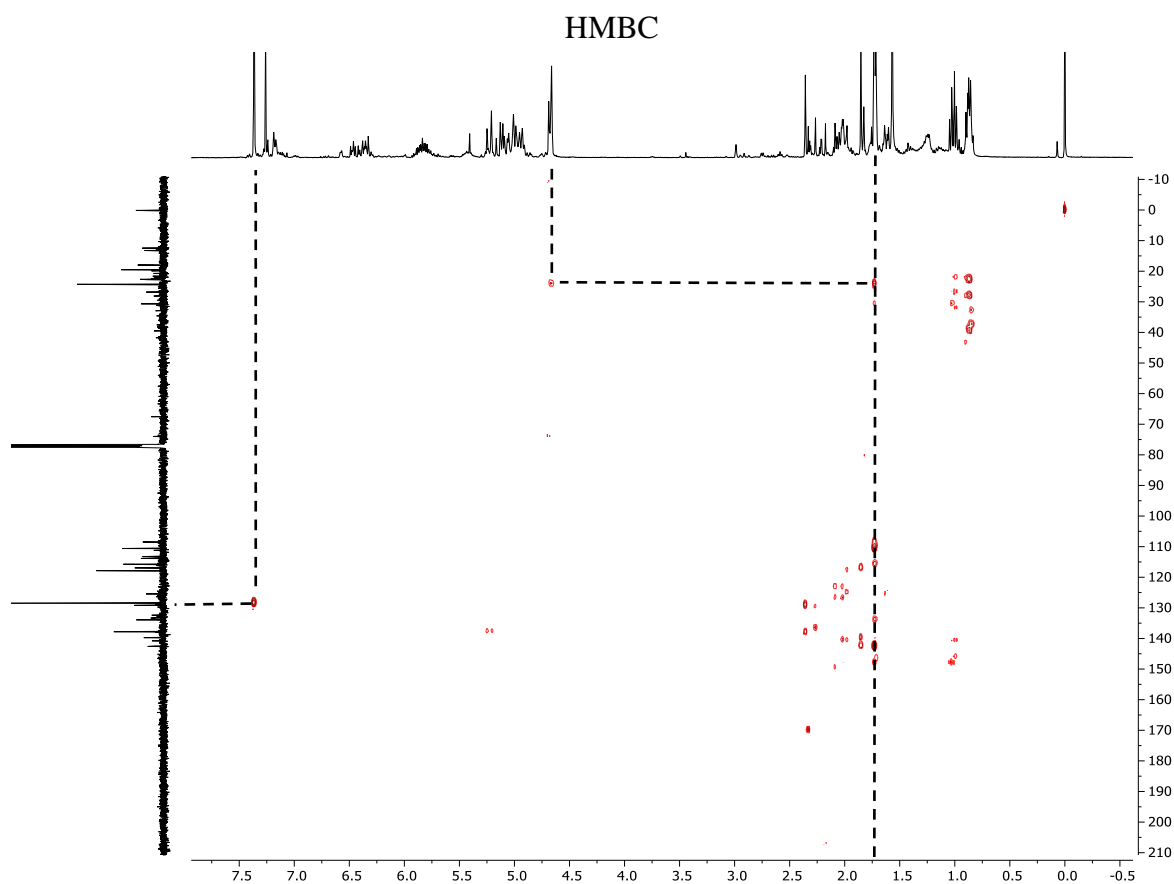

\* **Benzene:**  $^1\text{H}$  NMR ( $\text{CDCl}_3$ , 400 MHz)  $\delta$ : 7.36 (s) ppm.

\* **Ethene:**  $^1\text{H}$  NMR ( $\text{CDCl}_3$ , 400 MHz)  $\delta$ : 5.41 (s) ppm.

\* **Propene:**  $^1\text{H}$  NMR ( $\text{CDCl}_3$ , 400 MHz)  $\delta$ : 5.93-5.72 (ddq =CH, 1H), 4.97 (dd,  $J = 21.9$  Hz,  $J = 9.8$  Hz,  $\text{CH}_2=$ , 2H), 2.01 (d,  $J = 5.5$  Hz,  $\text{CH}_3$ , 3H) ppm.

\* **Butadiene:**  $^1\text{H}$  NMR ( $\text{CDCl}_3$ , 400 MHz)  $\delta$ : 6.41-6.29 (m, 2H) ppm, 5.23 (d,  $J = 16.2$  Hz, 2H), 5.12 (d,  $J = 9.5$  Hz, 2H) ppm.

**THF:**  $^1\text{H}$  NMR ( $\text{CDCl}_3$ , 400 MHz)  $\delta$ : 3.76 (m, 4H), 1.85 (m, 4H) ppm.

**2-Methylprop-1-ene:**  $^1\text{H}$  NMR ( $\text{CDCl}_3$ , 400 MHz)  $\delta$ : 4.66 (s,  $\text{CH}_2=$ , 2H), 1.71 (s,  $\text{CH}_3$ , 6H) ppm.

**Figure S15.**  $^1\text{H}$  NMR spectra of isolated vaped **1** with benzylamine **9** as trap for ketene.

$^1\text{H}$  NMR ( $\text{CDCl}_3$ , 400 MHz) of vape mixture containing benzylamide **10** (red asterisk)

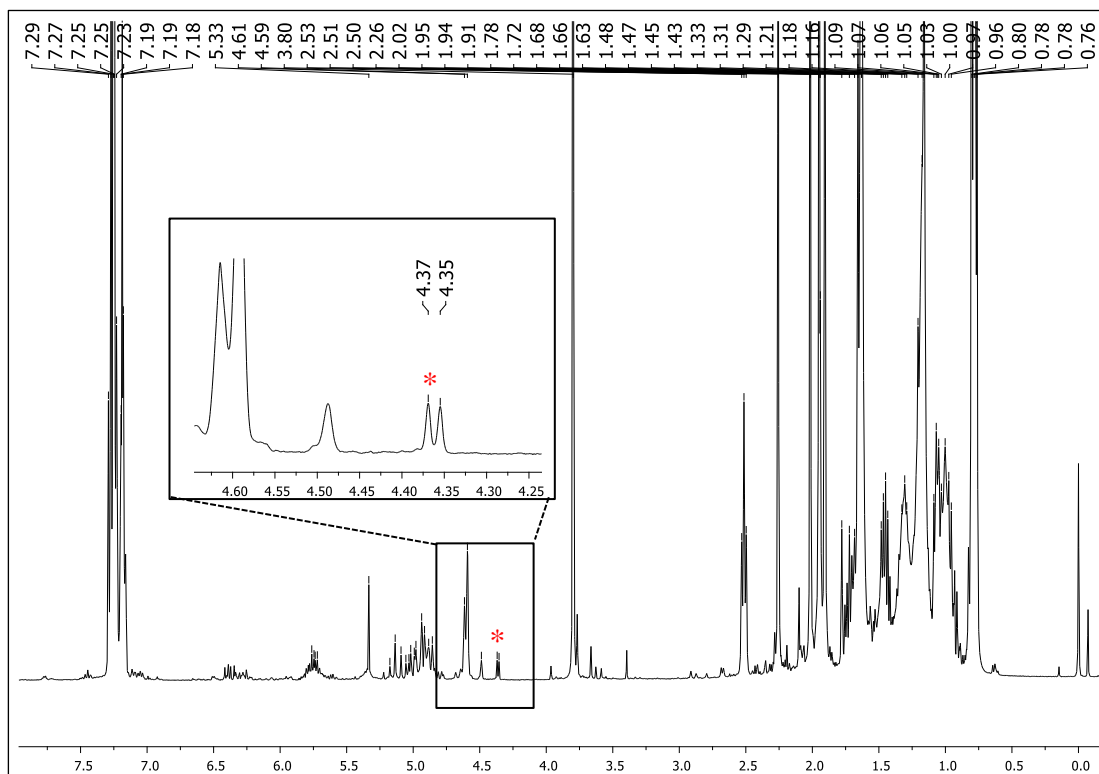

Confirmatory spiking NMR spectra. Top spectrum: vape mixture containing benzylamide **10** (red asterisk). Bottom spectrum: vaped mixture containing benzylamide **10** following spiking with pure benzylamide.

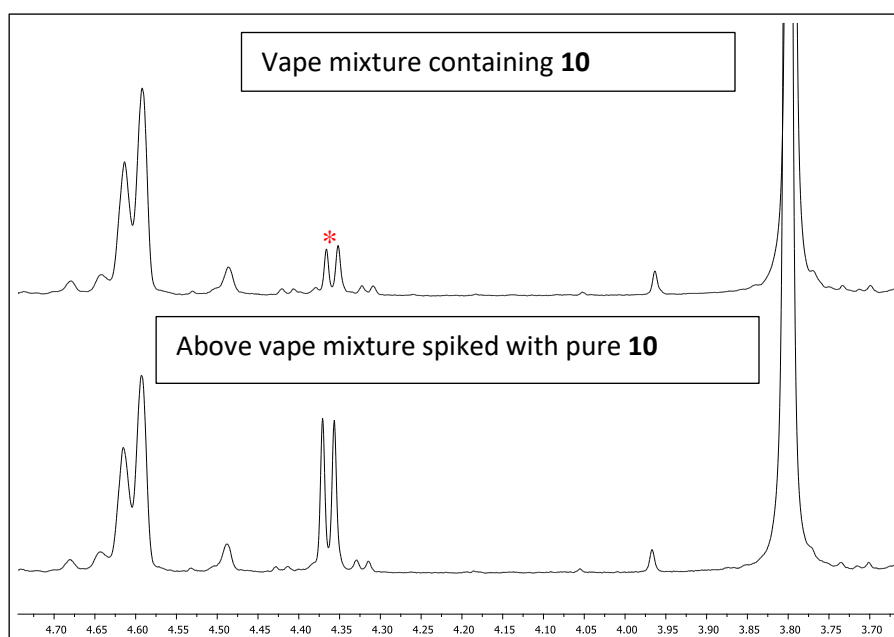

**Figure S16.**  $^1\text{H}$  NMR spectrum of synthesized benzylamide **10**.

$^1\text{H}$  NMR ( $\text{CDCl}_3$ , 400 MHz)

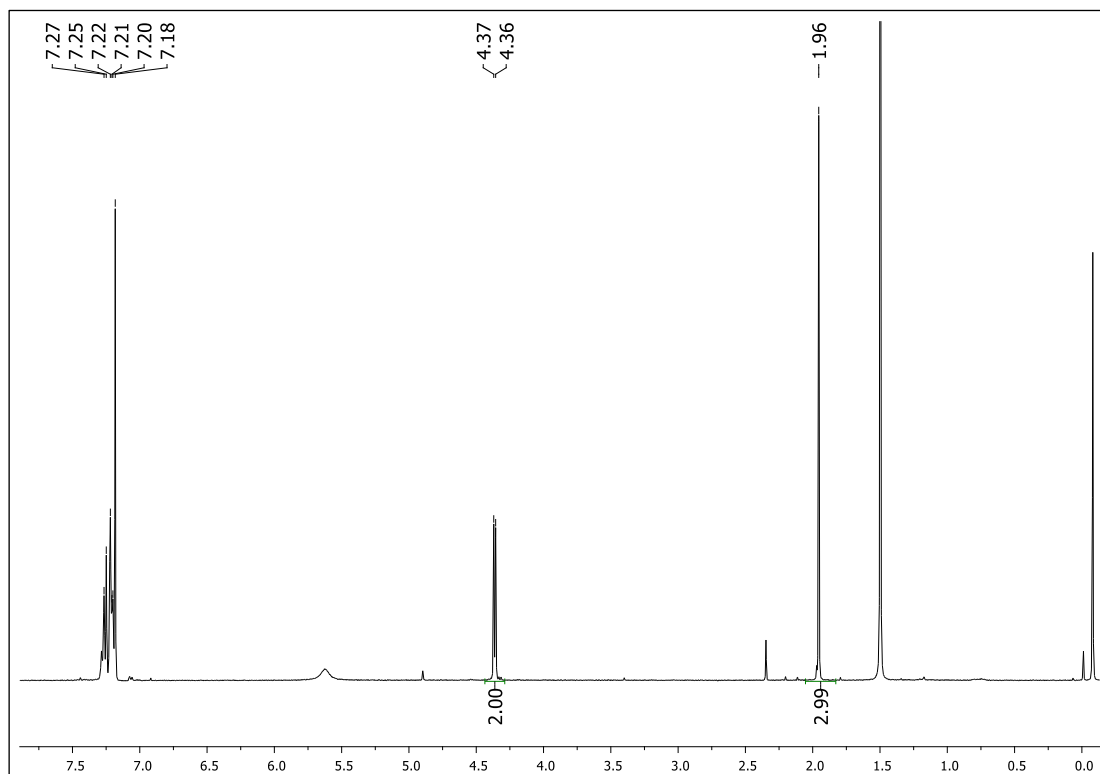

### Procedure for synthesis of benzylamide **10**

Triethylamine (7.66 mL, 54.9 mmol) was added to a solution of acetylchloride (3.71 mL, 52 mmol) in THF (5 mL), at 0 °C with stirring to in situ form ketene.<sup>†</sup> Benzylamine **9** (5.46 mL, 50 mmol) in THF (15 mL) was added and the reaction mixture stirred for 3 h, warmed to rt, and quenched with saturated  $\text{Na}_2\text{CO}_3$  solution (30 mL). The phases were separated and the aqueous layer was washed with  $\text{CH}_2\text{Cl}_2$  ( $3 \times 20$  mL). The combined organic layers were dried over  $\text{Na}_2\text{SO}_4$  and concentrated. The crude product was recrystallized in  $\text{CH}_2\text{Cl}_2$  / cyclohexane (1:1) to give *N*-benzylacetamide **10** as a solid (4.7 g, 63%, mp 61 °C).  $^1\text{H}$  NMR ( $\text{CDCl}_3$ , 400 MHz)  $\delta$ : 7.27-7.18 (m, 5H), 5.65 (s, br, 1H), 4.37 (d,  $J = 5.6$  Hz, 2H), 1.96 (s, 3H) ppm.  
<sup>†</sup>Tidwell, T.T, Ketene. *Sci. Synth.* **23**, 19-21 (2006).



**Figure S17.** HPLC of isolated vaped **1** mixture with benzylamine **9** (black asterisk) as trap for ketene forming benzylamide **10** (red asterisk)

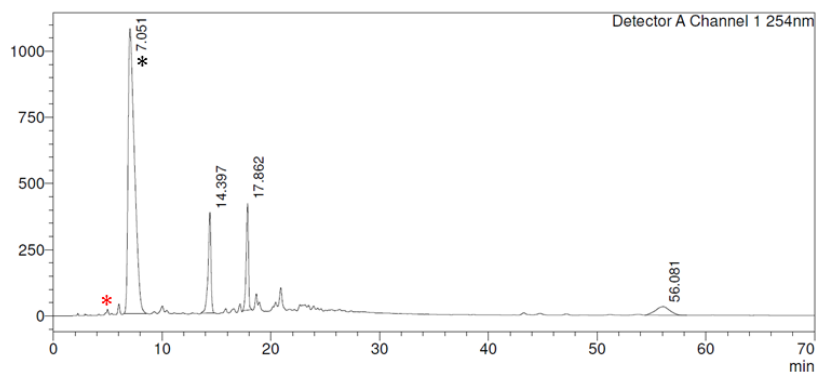

Expanded view of above HPLC trace showing benzylamide **10** (red asterisk)

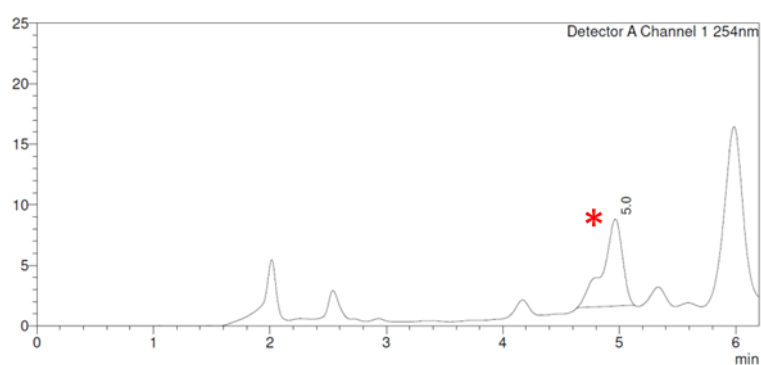

Above HPLC following spiking with pure **10** (red asterisk)

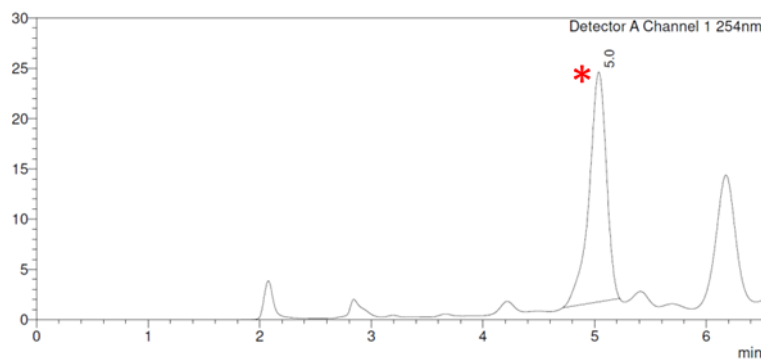

HPLC of pure benzylamide **10**

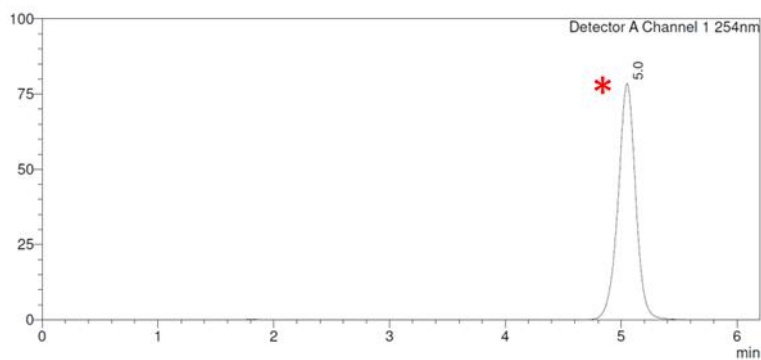

**Figure S18.** GC-MS spectra of isolated vaped **1** mixture with **9** as trap for ketene

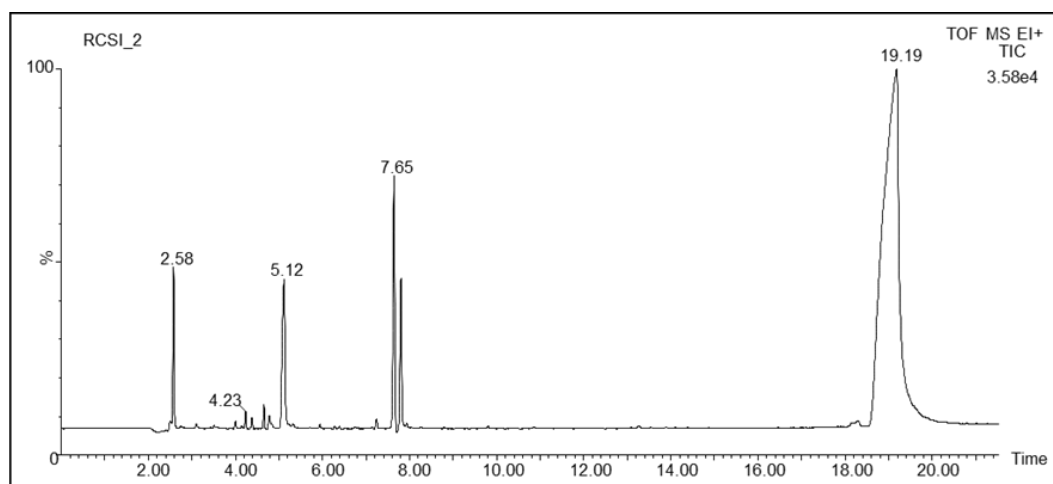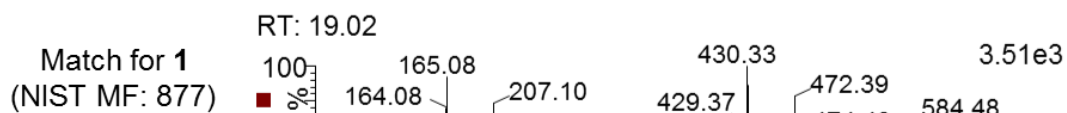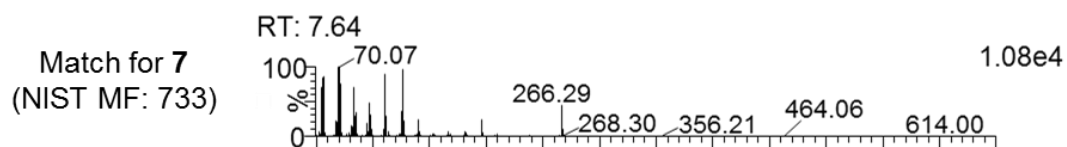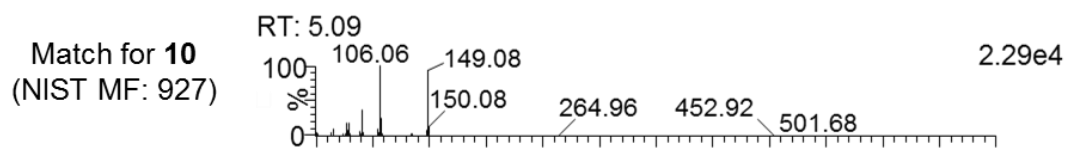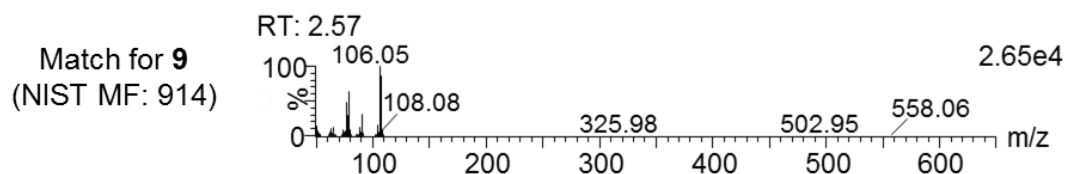

Accurate mass report for benzylamide **10**

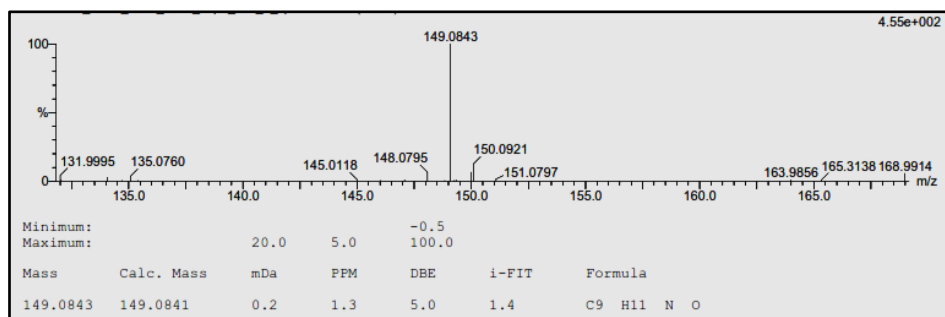

**Figure S19.** Photographs of experimental setup for Fig. 11A-C

Apparatus set up as shown in Fig. 11A and C

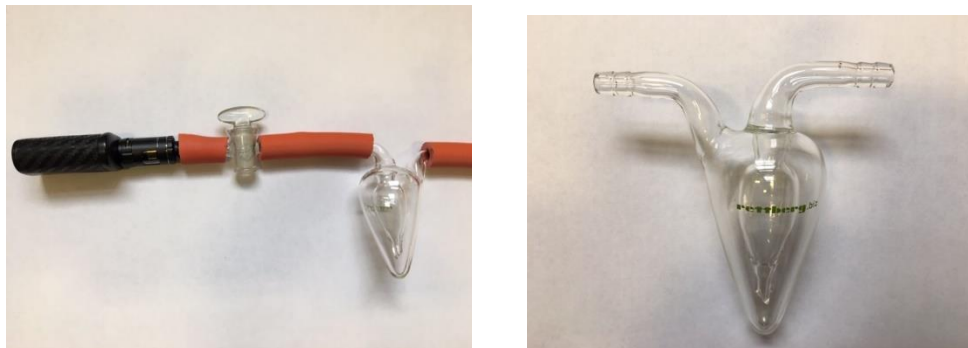

Apparatus set up as shown Fig. 11B

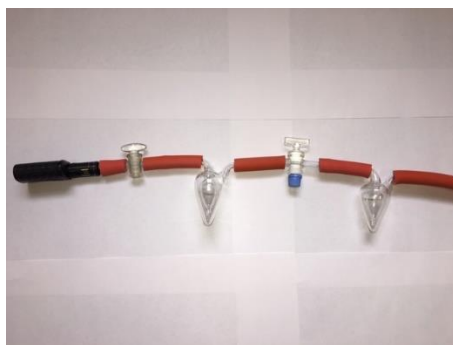

# Appendix NMR spectra of pure 1, 2, 8 and 9

## Vitamin E acetate 1

$^1\text{H}$  NMR ( $\text{CDCl}_3$ , 400 MHz)

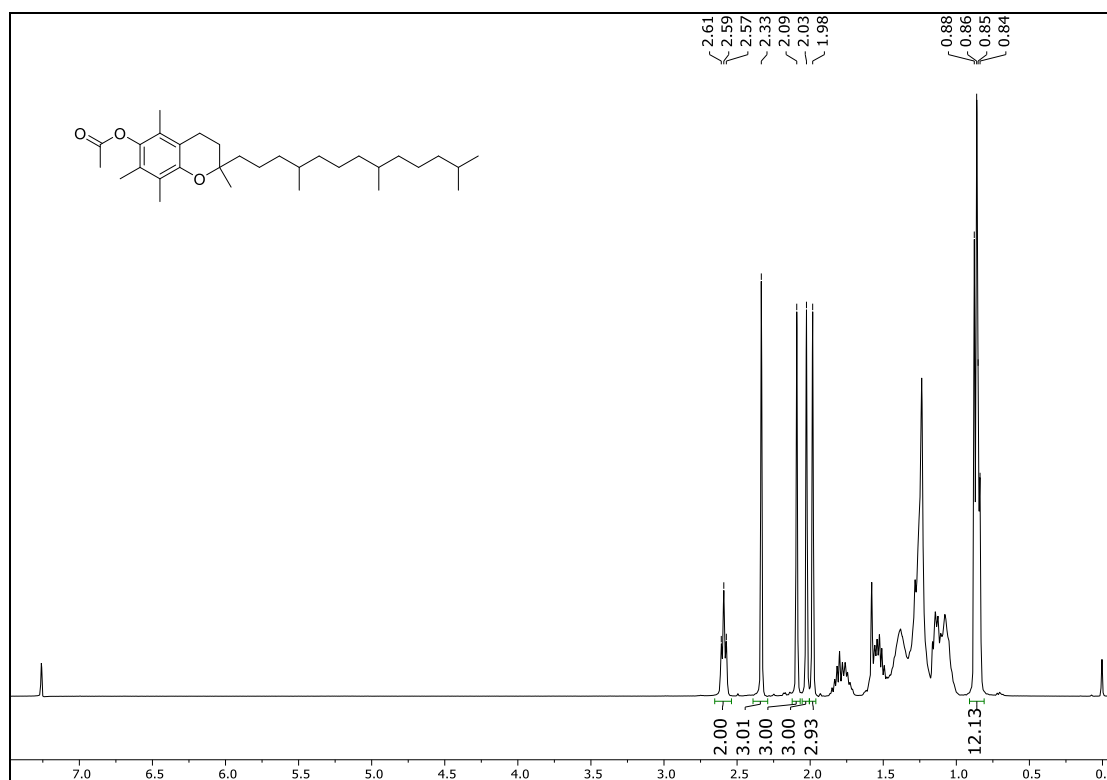

# Vitamin E 2

$^1\text{H}$  NMR ( $\text{CDCl}_3$ , 400 MHz)

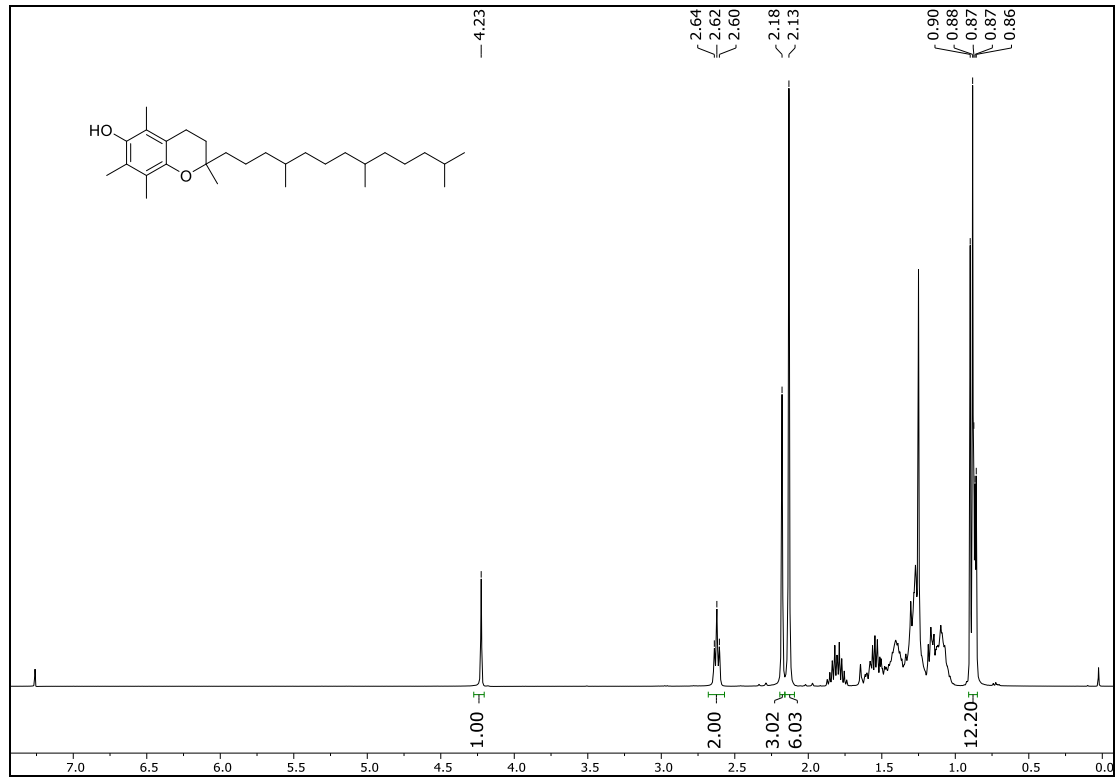

# Duroquinone **8**

$^1\text{H}$  NMR ( $\text{CDCl}_3$ , 400 MHz)

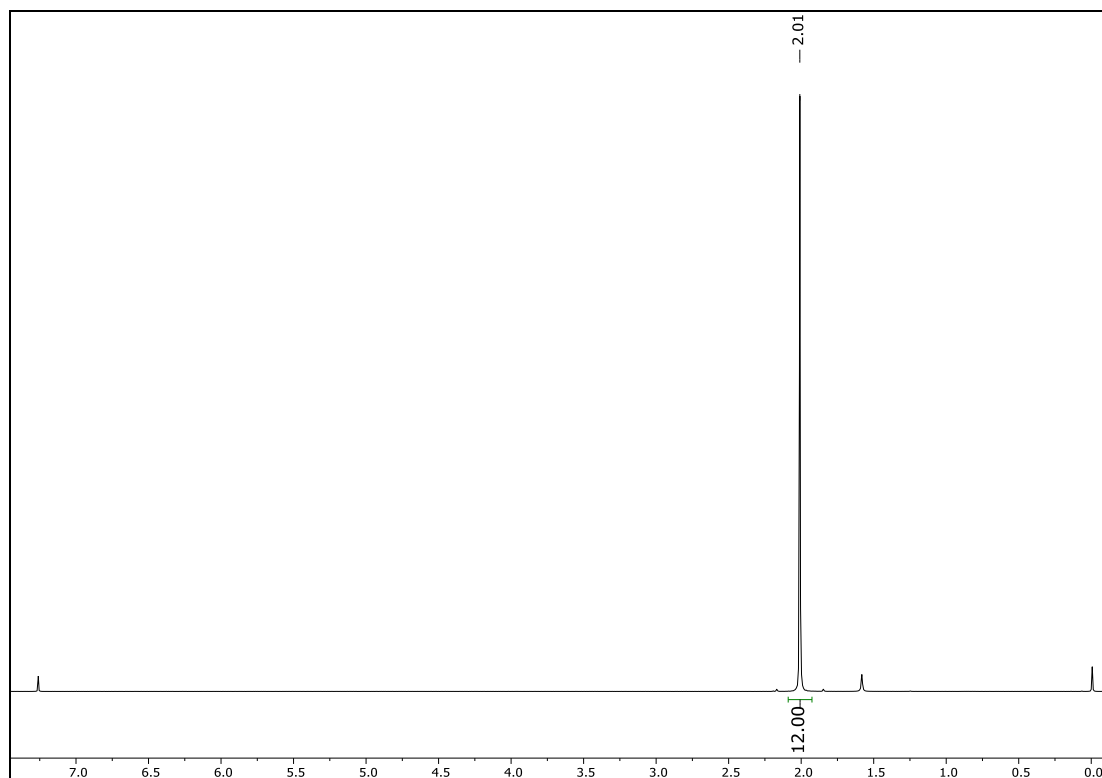

$^{13}\text{C}$  NMR ( $\text{CDCl}_3$ , 100 MHz)

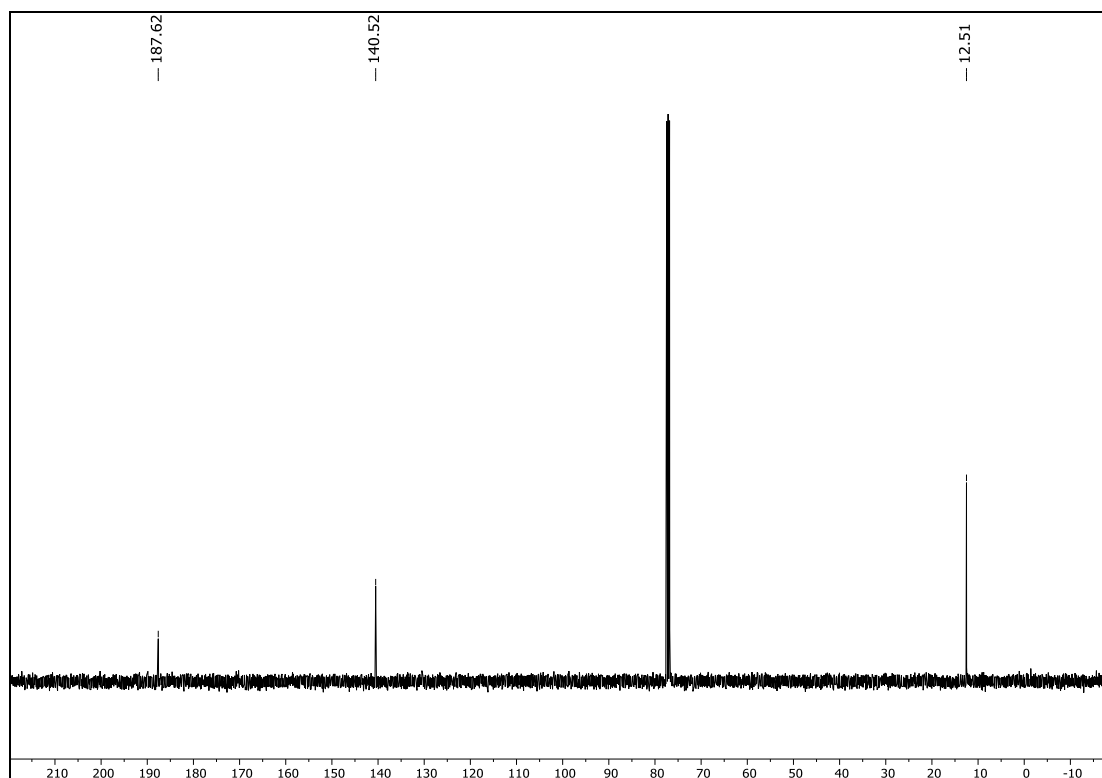

# Benzylamine **9**

$^1\text{H}$  NMR ( $\text{CDCl}_3$ , 400 MHz)

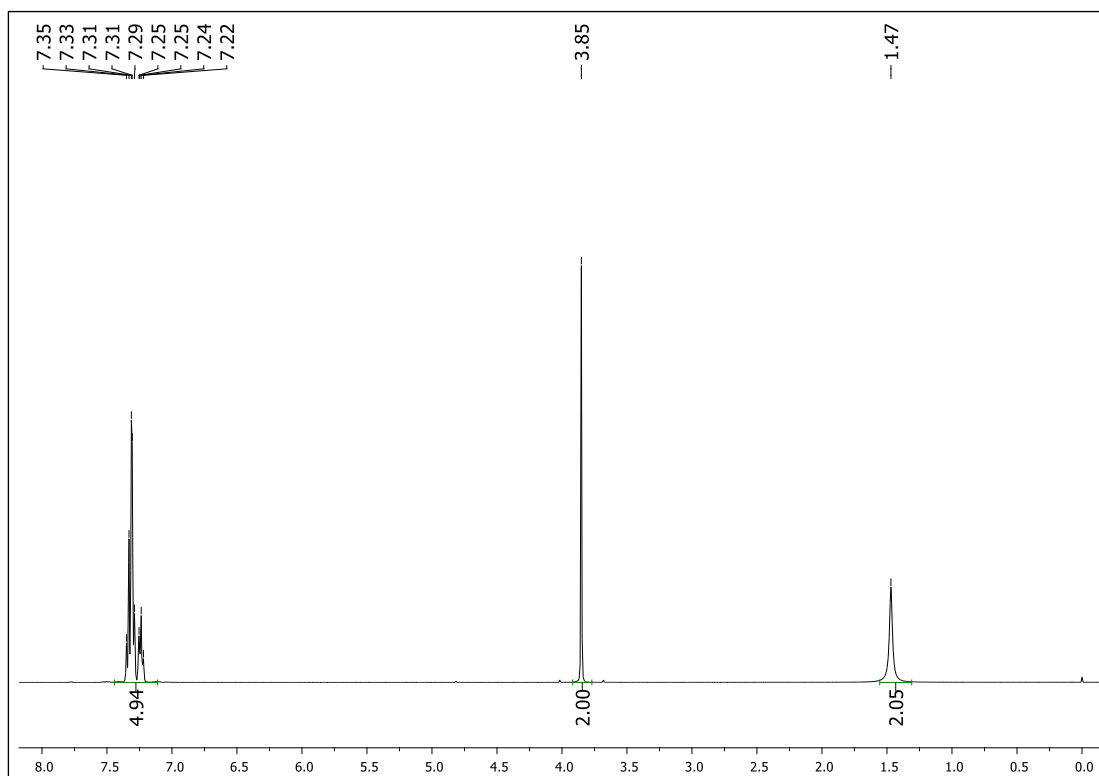

Supplement: pnas.1920925117.sapp.pdf [file pnas.1920925117.sapp.pdf]
